# Supplementary material for: Growth cone-localized microtubule organizing center establishes microtubule orientation in dendrites
Source: eLife. 2020 Jul 13;9:e56547. doi: 10.7554/eLife.56547 (PMC7375809; doi:10.7554/eLife.56547)
Supplement: Figure 1—source data 1. [file elife-56547-fig1-data1.xlsx]

## Sheet: Figure 1C
	No. of EBP-2::GFP tracks/s
Distance from MTOC center(μm)	Plus-end-out								Minus-end-out
-6.5		0.076			0.053					0			0
-4.9		0.152	0.121	0.121	0.267		0.226			0.015	0	0	0		0
-3.3		0.167	0.152	0.182	0.374	0.16	0.261	0.1		0.106	0	0	0	0.011	0.004	0
-1.6	0.242	0.197	0.227	0.197	0.374	0.191	0.154	0.15	0.03	0.197	0.152	0.136	0.053	0.064	0.094	0.075
0
1.6	0.152	0.076	0.152	0.091	0.214	0.181	0.073	0.075	0.409	0.167	0.197	0.182	0.214	0.17	0.218	0.251
3.3	0	0	0	0.015	0.107	0.032	0.009	0	0.409	0.212	0.197	0.167	0.267	0.181	0.269	0.301
4.9	0	0	0	0	0	0	0	0	0.288	0.242	0.212	0.197	0.321	0.213	0.248	0.276
6.5	0	0	0	0	0	0	0	0	0.273	0.167	0.212	0.182	0.214	0.213	0.256	0.226
8.2	0	0	0	0	0	0	0	0	0.182	0.136	0.242	0.182	0.267	0.202	0.205	0.226
9.8	0	0	0	0	0	0	0	0	0.136	0.136	0.227	0.152	0.267	0.191	0.197	0.226
11.4	0	0	0	0	0	0.011	0	0.025	0.121	0.136	0.167	0.152	0.214	0.17	0.162	0.226
13.1	0	0	0	0	0	0.011	0	0.025	0.106	0.121	0.121	0.106	0.214	0.17	0.124	0.201
14.7	0.015	0	0	0	0	0	0	0.025	0.106	0.121	0.106	0.061	0.214	0.17	0.12	0.125

## Sheet: Figure 1D
worm	No. of polymerization even/s	No. of depolymerization event/s
1	0.171249	0.214062
2	0.1254	0.13585
3	0.172032	0.16128
4	0.151757	0.132787
5	0.158854	0.136161
6	0.194691	0.171786
7	0.0772184	0.0772184

## Sheet: Figure 1-figure supplement 1F
distance to tip(um)	TBA-1 intensity
0	0.0523265
0.109	0.0771603
0.218	0.0838358
0.327	0.0798335
0.436	0.0961643
0.545	0.104782
0.654	0.112406
0.763	0.138283
0.872	0.147808
0.981	0.159138
1.09	0.179218
1.199	0.195311
1.308	0.185193
1.417	0.20401
1.526	0.208288
1.635	0.251403
1.744	0.236337
1.853	0.201076
1.962	0.189273
2.071	0.206631
2.18	0.239692
2.289	0.283269
2.398	0.283327
2.507	0.260292
2.616	0.233213
2.725	0.234804
2.834	0.243961
2.943	0.250384
3.052	0.29039
3.161	0.321534
3.27	0.372204
3.379	0.429204
3.488	0.452855
3.597	0.525974
3.706	0.618323
3.815	0.634732
3.924	0.621258
4.033	0.652801
4.142	0.710288
4.251	0.755167
4.36	0.781425
4.469	0.781244
4.578	0.742683
4.687	0.762789
4.796	0.80735
4.905	0.844817
5.014	0.859785
5.123	0.876112
5.232	0.89385
5.341	0.918537
5.45	0.941216
5.559	0.983655
5.668	1
5.777	0.985611
5.886	0.986443
5.995	0.974767
6.104	0.950949
6.213	0.898208
6.322	0.850642
6.431	0.801352
6.54	0.748054
6.649	0.73252
6.758	0.746497
6.867	0.762245
6.976	0.753636
7.085	0.737238
7.194	0.74176
7.303	0.744865
7.412	0.718053
7.521	0.691247
7.63	0.675299
7.739	0.679372
7.848	0.67418
7.957	0.677361
8.066	0.709057
8.175	0.713466
8.284	0.678401
8.393	0.644081
8.502	0.661117
8.611	0.674032
8.72	0.655893
8.829	0.643664
8.938	0.65496
9.047	0.599313
9.156	0.570233
9.265	0.557655
9.374	0.528408
9.483	0.497969
9.592	0.515445
9.701	0.528666
9.81	0.514522
9.919	0.507749
10.028	0.511844
10.137	0.475396
10.246	0.469242
10.355	0.491223
10.464	0.487564
10.573	0.466358
10.682	0.437919
10.791	0.45813
10.9	0.460848
11.009	0.434762
11.118	0.403284
11.227	0.381922
11.336	0.405062
11.445	0.395614
11.554	0.381051
11.663	0.373943
11.772	0.367174
11.881	0.387762
11.99	0.399062
12.099	0.349228
12.208	0.319302
12.317	0.306685
12.426	0.307558
12.535	0.325197
12.644	0.346384
12.753	0.325755
12.862	0.317535
12.971	0.346812
13.08	0.34849
13.189	0.352749
13.298	0.35013
13.407	0.314053
13.516	0.281122
13.625	0.279707
13.734	0.293839
13.843	0.31657
13.952	0.323752
14.061	0.320802
14.17	0.323979
14.279	0.306018
14.388	0.280504
14.497	0.263631
14.606	0.280422
14.715	0.291689
14.824	0.302637
14.933	0.302391
15.042	0.30025
15.151	0.303329
15.26	0.285547
15.369	0.286347
15.478	0.282688
15.587	0.256923
15.696	0.258027
15.805	0.255409
15.914	0.243229
16.023	0.256309
16.132	0.264693
16.241	0.253518
16.35	0.245153
16.459	0.258866
16.568	0.235438
16.677	0.257109
16.786	0.270283
16.895	0.268829
17.004	0.292184
