# Supplementary material for: Growth cone-localized microtubule organizing center establishes microtubule orientation in dendrites
Source: eLife. 2020 Jul 13;9:e56547. doi: 10.7554/eLife.56547 (PMC7375809; doi:10.7554/eLife.56547)
Supplement: Figure 2—source data 1. [file elife-56547-fig2-data1.xlsx]

## Sheet: Figure 2D
MTOC	GIP-1	GIP-2
1.199	1.853	3.052
5.777	1.33961	1.308
3.052	2.943	1.09
2.398	3.706	0.872
6.976	1.0137	1.744
3.2155	2.289	3.815
2.725	4.033	4.36
1.3625
4.142
1.09
4.251

## Sheet: Figure 2E
MTOC	GIP-1	GIP-2
1.2535	2.289	3.27
3.052	0.981	5.777
2.289	6.104	2.507
3.9785	4.36	4.142
2.18	1.853	3.597
1.4715	1.2208	4.578
3.3245	1.1445	3.488
1.5805
2.943
3.27
5.886

## Sheet: Figure 2G
	percentage of Minus-end-out EBP-2 tracks in proximal dendrite
No. of worm	Outgrowing dendrite			Mature dendrite
	WT	GIP-1 PVD(-)		WT	GIP-1 PVD(-)
1	94.74	0		100	8.69565
2	100	12.5		100	88.8889
3	100	10.26		85.7143	100
4	84.85	85.71		100	14.2857
5	100	96.77		83.3333	7.14286
6	70	95		100	9.09091
7	100	72.73		68.75	0
8	94.12	94.44		100	7.69231
9	90	72.73		75	100
10	92.59	80		100	7.69231
11	90	15.79		100	100
12		0		100	0
13		10.53		100
	wt vs. GIP-1PVD(-) in outgrowing dendrite
	Unpaired t test with Welch's correction
	P value	0.0028
	P value summary	**
	Significantly different (P < 0.05)?	Yes
	One- or two-tailed P value?	Two-tailed
	Welch-corrected t, df	t=3.655, df=13.36
	wt vs. GIP-1PVD(-) in mature dendrite
	Unpaired t test with Welch's correction
	P value	0.0011
	P value summary	**
	Significantly different (P < 0.05)?	Yes
	One- or two-tailed P value?	Two-tailed
	Welch-corrected t, df	t=4.239, df=12.26
