# Supplementary material for: Growth cone-localized microtubule organizing center establishes microtubule orientation in dendrites
Source: eLife. 2020 Jul 13;9:e56547. doi: 10.7554/eLife.56547 (PMC7375809; doi:10.7554/eLife.56547)
Supplement: Figure 3—source data 1. [file elife-56547-fig3-data1.xlsx]

## Sheet: Figure 3C
	No. of MT
Distance to MTOC (um)	cell 1	cell 2	cell 3
-2.82	7
-2.76	7
-2.7	8
-2.64	8
-2.58	9
-2.52	9
-2.46	9
-2.4	9
-2.34	9
-2.28	9
-2.22	10
-2.16	10
-2.1	10
-2.04	10
-1.98	10
-1.92	10
-1.86	10
-1.8	10
-1.74	10		2
-1.68	10		3
-1.62	9		3
-1.56	9	9	3
-1.5	9	9	3
-1.44	9	10	4
-1.38	9	10	5
-1.32	9	10	5
-1.26	9	10	5
-1.2	9	11	5
-1.14	9	11	6
-1.08	9	11	6
-1.02	9	11	6
-0.96	9	11	6
-0.9	9	11	6
-0.84	9	11	6
-0.78	9	11	7
-0.72	9	11	7
-0.66	9	11	7
-0.6	10	11	7
-0.54	10	11	10
-0.48	10	11	12
-0.42	10	11	14
-0.36	10	10	14
-0.3	10	11	14
-0.24	10	12	14
-0.18	10	12	14
-0.12	10	13	14
-0.06	10	14	15
0	10	14	15
0.06	10	14	14
0.12	10	14	14
0.18	10	14	15
0.24	10	13	15
0.3	10	12	15
0.36	10	12	15
0.42	10	12	14
0.48	10	12	13
0.54	10	12	12
0.6	9	12	12
0.66	8	12	12
0.72	8	12	12
0.78	9	11	12
0.84	10	11	12
0.9	10	11	12
0.96	10	11	12
1.02	9	11	12
1.08	9	11	12
1.14	9	11	11
1.2	10	11	11
1.26	10	11	11
1.32	10	11	11
1.38	10	10	11
1.44	10	10	10
1.5	10	10	10
1.56	10	9	10
1.62	9	8	10
1.68	8	8	10
1.74	7	8	10
1.8	6	8	9
1.86	6	8	9
1.92	5	9	9
1.98	5	10	9
2.04	5	10	9
2.1	4	10	9
2.16	4	10	9
2.22	3	10	9
2.28	3	10	9
2.34	4	10	10
2.4	4	10	10
2.46	4	10	10
2.52	4	11	10
2.58	4	11	9
2.64		11	9
2.7		11	9
2.76		11	9
2.82		10	9
2.88		8	9
2.94		8	9
3		7	9
3.06		7	9
3.12		7	8
3.18		7	8
3.24		7	8
3.3		7	8
3.36		6	8
3.42		5	8
3.48		5	8
3.54		5	8
3.6		5	8
3.66		5	8
3.72		6	8
3.78			8
3.84			8
3.9			8
3.96			8
4.02			8
4.08			8
4.14			8
4.2			8
4.26			8
4.32			8
4.38			8
4.44			7
4.5			7
4.56			7
4.62			7
4.68			7
4.74			7
4.8			7
4.86			7
4.92			7
4.98			7
5.04			7
5.1			6
5.16			7
5.22			7
5.28			7
5.34			7
5.4			6
5.46			6
5.52			6
5.58			6
5.64			6
5.7			6
5.76			6
5.82			7
5.88			7
5.94			6
6			7
6.06			7
6.12			7
6.18			6
6.24			6
6.3			6
6.36			6
6.42			6
6.48			6
6.54			6
6.6			6
6.66			6
6.72			6
6.78			6
6.84			6
6.9			6

## Sheet: Figure 3E
	Portion of overlap
No. of worm	RAB-11.1 with GIP-2	GIP-2 with RAB-11.1	randomized RAB-11.1 with GIP-2	randomized GIP-2 with RAB-11.1
1	0.7884	0.7961	0.2875	0.0213
2	0.7251	0.6636	0.2487	0.0026
3	0.847	0.833	0.2385	0.1047
4	0.7508	0.8425	0.158	0
5	0.8723	0.9137	0	0.1943
6	0.7468	0.5916	0.232	0
7	0.9455	1	0.3507	0
8	0.9451	1	0.2615	0
9	0.777	0.7219	0	0
10	0.6025	0.5004	0.2715	0
11	0.994	1	0.3369	0
	Brown-Forsythe and Welch ANOVA tests
	Dunnett's T3 multiple comparisons test	Mean Diff.	95.00% CI of diff.	Significant?	Summary	Adjusted P Value
	RAB-11.1 with GIP-2 vs. randomized RAB-11.1 with GIP-2	0.6008	0.4399 to 0.7618	Yes	****	<0.0001	A-C
	GIP-2 with RAB-11.1 vs. randomized GIP-2 with RAB-11.1	0.7764	0.5877 to 0.9650	Yes	****	<0.0001	B-D

## Sheet: Figure 3F
	Normalized Intensity
	t=0s				t=200s				t=400s
distance(μm)	RAB-11.1	GIP-2			RAB-11.1	GIP-2			RAB-11.1	GIP-2
0	0.05273	0.136703			0.0565171	0.122843			0.00281807	0.0123298
0.109	0.0835513	0.114615			0.0737557	0.145838			0.0987609	0.487593
0.218	0.0792794	0.127863			0.0605258	0.160446			0.11386	0.460829
0.327	0.0750814	0.162829			0.0491629	0.183919			0.13347	0.389728
0.436	0.0877084	0.189658			0.0706219	0.170348			0.107896	0.433845
0.545	0.0602816	0.203059			0.0639274	0.218602			0.129112	0.308168
0.654	0.0529186	0.159663			0.0638259	0.230571			0.12321	0.277007
0.763	0.0751716	0.128056			0.0576195	0.170189			0.132223	0.302087
0.872	0.0872492	0.10429			0.0685852	0.169323			0.149274	0.350184
0.981	0.0748846	0.137716			0.0557892	0.194127			0.119011	0.41255
1.09	0.0780167	0.16917			0.0408551	0.222118			0.10815	0.360513
1.199	0.0732939	0.131822			0.0603334	0.249296			0.111076	0.3003
1.308	0.0715885	0.106308			0.0819779	0.262243			0.118735	0.251586
1.417	0.072761	0.0974642			0.104499	0.301861			0.130381	0.196108
1.526	0.0977936	0.133882			0.0996696	0.281534			0.118885	0.273167
1.635	0.110232	0.13858			0.0818624	0.287183			0.107127	0.297957
1.744	0.125868	0.135247			0.0786901	0.29957			0.125999	0.278698
1.853	0.146522	0.155205			0.0790365	0.300677			0.141963	0.273341
1.962	0.147137	0.176214			0.0634112	0.290428			0.162332	0.240876
2.071	0.123753	0.196192			0.0765904	0.242658			0.190441	0.278042
2.18	0.188527	0.199512			0.0763751	0.287713			0.194887	0.379978
2.289	0.19152	0.181527			0.0656299	0.251835			0.212838	0.309689
2.398	0.137175	0.208386			0.0837749	0.235672			0.210608	0.3213
2.507	0.158083	0.193502			0.0927074	0.213365			0.25518	0.347558
2.616	0.140307	0.230937			0.101913	0.189085			0.417555	0.42006
2.725	0.120047	0.239247			0.110172	0.237415			0.546731	0.556205
2.834	0.149695	0.253601			0.105918	0.226742			0.613039	0.641221
2.943	0.208665	0.2416			0.0998604	0.19355			0.633047	0.734245
3.052	0.144358	0.209006			0.123179	0.213147			0.795024	0.75553
3.161	0.162691	0.218983			0.14282	0.163869			0.902822	0.8746
3.27	0.226925	0.28497			0.151762	0.202704			0.978857	0.914118
3.379	0.351973	0.515292			0.164325	0.242911			1	0.922193
3.488	0.520847	0.691051			0.205479	0.361442			0.911674	1
3.597	0.594944	0.716919			0.320302	0.542004			0.803018	0.899892
3.706	0.633801	0.757449			0.478013	0.656901			0.678517	0.744995
3.815	0.605726	0.781303			0.615715	0.841609			0.648365	0.70732
3.924	0.440288	0.74056			0.736434	0.991483			0.564463	0.517533
4.033	0.256205	0.796763			0.937163	1			0.45105	0.383191
4.142	0.251949	0.883896			1	0.897438			0.354546	0.245915
4.251	0.439608	0.91313			0.879416	0.853531			0.304339	0.280368
4.36	0.644337	0.935906			0.794202	0.87122			0.22689	0.339893
4.469	0.703331	0.944971			0.642563	0.735212			0.138557	0.492315
4.578	0.7369	0.943061			0.588669	0.635106			0.147199	0.442526
4.687	0.659613	0.869866			0.461864	0.460075			0.14515	0.297671
4.796	0.677553	0.835444			0.327766	0.33963			0.161123	0.263578
4.905	0.870598	0.923244			0.245188	0.273317			0.141498	0.254613
5.014	1	1			0.204429	0.239406			0.148867	0.255209
5.123	0.949558	0.937379			0.176447	0.292213			0.173816	0.256093
5.232	0.85506	0.755312			0.169168	0.348271			0.168882	0.222706
5.341	0.735071	0.562489			0.189591	0.290257			0.226907	0.187569
5.45	0.515345	0.43012			0.200568	0.208741			0.293731	0.22138
5.559	0.353654	0.384644			0.189007	0.274524			0.277858	0.254579
5.668	0.292356	0.401263			0.162335	0.282965			0.250361	0.332814
5.777	0.273014	0.400708			0.153046	0.217217			0.229637	0.357795
5.886	0.239183	0.348793			0.180585	0.222407			0.301945	0.395483
5.995	0.24876	0.386395			0.207131	0.23427			0.236594	0.378208
6.104	0.310271	0.41981			0.189754	0.255705			0.174228	0.379607
6.213	0.282426	0.431822			0.168635	0.377405			0.150541	0.294678
6.322	0.257328	0.423197			0.187051	0.489981			0.151007	0.248869
6.431	0.202179	0.354161			0.200008	0.550769			0.150519	0.254536
6.54	0.149761	0.309927			0.193203	0.594752			0.165592	0.301188
6.649	0.138823	0.262157			0.193735	0.440714			0.194394	0.306223
6.758	0.16238	0.208284			0.146021	0.290952			0.163841	0.347994
6.867	0.181205	0.176705			0.127961	0.297149			0.149817	0.29799
6.976	0.147998	0.159093			0.155881	0.265053			0.126949	0.294486
7.085	0.165446	0.188371			0.153042	0.28925			0.128803	0.320806
7.194	0.180509	0.221949			0.15355	0.372604			0.164281	0.292416
7.303	0.224924	0.286924			0.199007	0.300047			0.184791	0.312396
7.412	0.234337	0.323268			0.202382	0.264699			0.153987	0.33482
7.521	0.257919	0.309063			0.169742	0.229569			0.181963	0.317781
7.63	0.270234	0.235277			0.14594	0.246104			0.209187	0.406818
7.739	0.166807	0.183388			0.148259	0.252182			0.179116	0.401223
7.848	0.14872	0.167595			0.137452	0.229022			0.157617	0.360204
7.957	0.172736	0.172734			0.150544	0.271344			0.181651	0.335953
8.066	0.163782	0.155129			0.192986	0.296619			0.195439	0.217574
8.175	0.165709	0.158562			0.173719	0.278483			0.143979	0.17077
8.284	0.147383	0.239417			0.184818	0.29891			0.177379	0.268495
8.393	0.149581	0.327026			0.185154	0.263951			0.183981	0.344098
8.502	0.201302	0.366959			0.203344	0.195199			0.172688	0.289758
8.611	0.120202	0.339828			0.264212	0.211233			0.162874	0.222282
8.72	0.111839	0.269163			0.283688	0.212988			0.123767	0.2317
8.829	0.11252	0.257682			0.274063	0.136043			0.0856559	0.167095
8.938	0.13096	0.22161			0.241181	0.137133			0.104792	0.0874347
9.047	0.122367	0.253146			0.224095	0.201549			0.145499	0.20835
9.156	0.172285	0.271391			0.224508	0.286387			0.13378	0.176475
9.265	0.201277	0.3006			0.181088	0.316075			0.103159	0.206807
9.374	0.165389	0.301656			0.167905	0.257943			0.130402	0.321812
9.483	0.160863	0.290627			0.146686	0.270036			0.16678	0.316888
9.592	0.171924	0.295279			0.126863	0.280332			0.098085	0.24079
9.701	0.153869	0.258143			0.108994	0.279749			0.104	0.26585
9.81	0.145506	0.307391			0.112501	0.267633			0.127803	0.296172
9.919	0.185059	0.314164			0.0961561	0.282771			0.130847	0.291967
10.028	0.153516	0.274723			0.0934983	0.26679			0.150829	0.247561
10.137	0.163847	0.227754			0.11674	0.25637			0.139656	0.27478
10.246	0.1805	0.205471			0.0940284	0.20751			0.180725	0.253919
10.355	0.165619	0.179676			0.0770505	0.221205			0.205379	0.22559
10.464	0.150023	0.208775			0.0790698	0.251959			0.2043	0.197222
10.573	0.152549	0.201572			0.132878	0.293862			0.157034	0.217485
10.682	0.12563	0.176006			0.171527	0.297797			0.149886	0.23266
10.791	0.0959979	0.195003			0.138467	0.292926			0.121989	0.161385
10.9	0.121276	0.215595			0.125591	0.275402			0.0911017	0.176944
11.009	0.161568	0.24639			0.134241	0.28452			0.140296	0.232837
11.118	0.181624	0.257275			0.153049	0.335165			0.173394	0.24603
11.227	0.192603	0.211308			0.159826	0.325941			0.148079	0.348939
11.336	0.23592	0.182658			0.161256	0.256406			0.144366	0.493409
11.445	0.246981	0.166932			0.141449	0.208241			0.148144	0.4287
11.554	0.247473	0.167985			0.128691	0.236909			0.132237	0.386242
11.663	0.260206	0.165502			0.151303	0.250244			0.162724	0.314153
11.772	0.206517	0.155557			0.142752	0.227767			0.186871	0.321047
11.881	0.229926	0.152778			0.113323	0.193615			0.169025	0.337572
11.99	0.219488	0.126435			0.104368	0.181116			0.136807	0.288466
12.099	0.195382	0.118111			0.117491	0.183195			0.138968	0.402496
12.208	0.172547	0.156255			0.121918	0.225505			0.192702	0.480196
12.317	0.117644	0.168328			0.106859	0.25276			0.244758	0.336916
12.426	0.123302	0.17377			0.0849577	0.240714			0.253176	0.204696
12.535	0.145268	0.157874			0.107622	0.251805			0.20402	0.218226
12.644	0.141496	0.16152			0.13678	0.254338			0.211015	0.274245
12.753	0.170661	0.18087			0.137069	0.225912			0.169508	0.249863
12.862	0.221095	0.158276			0.127162	0.25154			0.179316	0.174987
12.971	0.234673	0.164174			0.128217	0.183201			0.14538	0.194798
13.08	0.241667	0.17232			0.109717	0.129752			0.12445	0.161741
13.189	0.21042	0.184388			0.0929558	0.121405			0.124147	0.164955
13.298	0.191479	0.159465			0.0911308	0.178377			0.117609	0.185307
13.407	0.178196	0.161198			0.116607	0.155946			0.106715	0.218728
13.516	0.207624	0.145977			0.137781	0.131914			0.0824523	0.254942
13.625	0.215184	0.135408			0.147508	0.155787			0.0737148	0.336085
13.734	0.183034	0.152489			0.141778	0.160211			0.0869007	0.304255
13.843	0.1637	0.145708			0.12899	0.254974			0.0768614	0.282012
13.952	0.188232	0.139943			0.158365	0.277199			0.0618713	0.286886
14.061	0.194841	0.126329			0.173207	0.19765			0.0513393	0.261976
14.17	0.189159	0.112164			0.16524	0.141792			0.0703137	0.208895
14.279	0.213904	0.118864			0.179847	0.133357			0.119037	0.213028
14.388	0.277343	0.148562			0.183417	0.134712			0.106508	0.26923
14.497	0.337206	0.180978			0.170344	0.118513			0.0863581	0.359851

## Sheet: Figure 3J
	GIP-2 localization class(%)
	cluster in growth cone	no GIP-2	dispersed puncta in cell body	dispersed puncta in dendrite
WT	100	0	0	0		n=30
RAB-11.1	100	0	0	0		n=25
RAB-11.1(S25N)	68	32	0	0		n=28
RAB-11.1PVD(-)	81	0	12	7		n=41
