# Supplementary material for: Growth cone-localized microtubule organizing center establishes microtubule orientation in dendrites
Source: eLife. 2020 Jul 13;9:e56547. doi: 10.7554/eLife.56547 (PMC7375809; doi:10.7554/eLife.56547)
Supplement: Figure 4—source data 1. [file elife-56547-fig4-data1.xlsx]

## Sheet: Figure 4B
	portion of Minus-end-out EBP-2 tracks in proximal dendrite
	outgrowing dendrite		mature dendrite
No. of worm	WT	unc-116	WT	unc-116
1	94.7368	6.66667	100	100
2	100	93.3333	100	0
3	100	0	85.7143	100
4	100	50	100	0
5	100	90.9091	83.3333	90
6	70	6.45161	100	100
7	100	0	68.75	85.7143
8	94.1176	0	100	16.6667
9	90	0	75	0
10	92.5926	0	100	0
11	90	0	100	0
12		9.09091	100	0
13			100	0
14				80
15				35
16				57.1429
17				58.3333
18				100
19				9.09091
	outgrowing dendrite
	Unpaired t test with Welch's correction
	P value	<0.0001
	P value summary	****
	Significantly different (P < 0.05)?	Yes
	One- or two-tailed P value?	Two-tailed
	Welch-corrected t, df	t=6.766, df=12.46
	mature dendrite
	Unpaired t test with Welch's correction
	P value	0.0001
	P value summary	***
	Significantly different (P < 0.05)?	Yes
	One- or two-tailed P value?	Two-tailed
	Welch-corrected t, df	t=4.762, df=21.38

## Sheet: Figure 4I
Time(s)	Diameter(μm)	displacement(μm)
0	0.545	0
0.8	0.436	0.0545
1.6	0.763	0
2.4	0.763	0.109
3.2	1.308	-0.1635
4	1.199	-0.109
4.8	1.308	-0.0545
5.6	1.417	-0.109
6.4	1.308	-0.0545
7.2	1.199	0.109
8	0.545	0.218
8.8	1.417	0.109
9.6	1.308	0.1635
10.4	1.199	0.218
11.2	1.526	0.1635
12	1.744	0.1635
12.8	1.308	0.2725
13.6	1.744	0.3815
14.4	1.417	0.436
15.2	1.744	0.4905
16	1.744	0.3815
16.8	1.526	0.1635
17.6	1.308	0.3815
18.4	1.308	0.3815
19.2	1.09	0.4905
20	1.09	0.3815
20.8	1.308	0.2725
21.6	0.763	0.654
22.4	0.763	0.763
23.2	1.199	0.545
24	1.199	0.545
24.8	1.199	0.545
25.6	1.09	0.5995
26.4	1.635	0.327
27.2	1.09	0.5995
28	1.09	0.5995
28.8	1.09	0.5995
29.6	1.308	0.5995
30.4	1.199	0.654
31.2	1.199	0.654
32	1.417	0.545
32.8	0.872	0.3815
33.6	1.09	0.5995
34.4	1.635	0.654
35.2	1.744	0.7085
36	0.654	0.3815
36.8	0.981	0.654
37.6	1.308	0.5995
38.4	1.308	0.5995
39.2	1.308	0.7085
40	1.526	0.5995
40.8	1.308	0.5995
41.6	0.981	0.545
42.4	0.872	0.4905
43.2	0.763	0.545
44	0.654	0.5995
44.8	0.545	0.654
45.6	0.654	0.7085
46.4	0.545	0.872
47.2	0.654	0.8175
48	0.981	0.763
48.8	1.09	0.8175
49.6	1.09	0.8175
50.4	0.545	0.981
51.2	0.654	1.0355
52	1.09	1.0355
52.8	0.763	1.09
53.6	1.09	1.0355
54.4	1.308	1.0355
55.2	1.09	1.1445
56	0.872	1.1445
56.8	0.981	1.199
57.6	1.526	0.9265
58.4	1.308	1.0355
59.2	1.526	1.0355
60	0.872	1.3625
60.8	1.09	1.3625
61.6	1.09	1.3625
62.4	1.853	1.199
63.2	1.09	1.3625
64	0.981	1.417
64.8	0.872	1.4715
65.6	0.872	1.4715
66.4	0.872	1.4715
67.2	1.199	1.635
68	0.545	1.417
68.8	0.436	1.3625
69.6	0.545	1.308
70.4	0.545	1.308
71.2	0.436	1.3625
72	0.436	1.4715
72.8	0.872	1.6895
73.6	1.199	1.853
74.4	1.199	1.962
75.2	1.417	1.962
76	1.417	1.962
76.8	1.526	1.7985
77.6	1.199	1.744
78.4	1.635	1.744
79.2	1.526	1.6895
80	2.18	1.4715
80.8	1.526	1.3625
81.6	1.744	1.4715
82.4	1.853	1.526
83.2	2.071	1.417
84	1.853	1.635
84.8	2.289	1.417
85.6	2.289	1.417
86.4	2.398	1.4715
87.2	2.398	1.5805
88	2.398	1.4715
88.8	1.744	1.7985
89.6	2.943	1.526
90.4	2.725	1.635
91.2	1.635	1.635
92	1.744	1.5805
92.8	1.417	2.289
93.6	2.071	1.199
94.4	1.09	2.1255
95.2	1.09	2.0165
96	0.763	1.635
96.8	0.981	1.417
97.6	0.654	1.5805
98.4	0.654	1.4715
99.2	0.545	1.417
100	1.417	1.744
100.8	0.654	1.3625
101.6	0.872	1.4715
102.4	0.872	1.4715
103.2	0.436	1.3625
104	0.654	1.4715
104.8	0.654	1.4715
105.6	0.654	1.5805
106.4	1.308	1.9075
107.2	1.417	1.962
108	0.654	1.5805
108.8	0.654	1.6895
109.6	0.545	1.635
110.4	0.872	1.5805
111.2	0.872	1.5805
112	0.763	1.635
112.8	0.654	1.6895
113.6	0.654	1.6895
114.4	0.872	1.6895
115.2	0.872	1.7985
116	0.763	1.635
116.8	0.654	1.7985
117.6	0.545	1.744
118.4	0.872	1.6895
119.2	0.763	1.744
120	0.654	1.7985
120.8	0.872	1.7985
121.6	0.872	1.7985
122.4	0.872	1.7985
123.2	0.872	1.6895
124	1.199	1.962
124.8	0.872	1.7985
125.6	1.09	1.9075
126.4	0.981	1.853
127.2	0.763	1.635
128	0.436	1.7985
128.8	0.436	1.7985
129.6	0.654	1.6895
130.4	0.654	1.6895
131.2	0.436	1.6895
132	0.654	1.5805
132.8	0.654	1.5805
133.6	0.763	1.635
134.4	0.763	1.635
135.2	0.763	1.635
136	0.763	1.635
136.8	0.654	1.5805
137.6	0.545	1.635
138.4	0.654	1.5805
139.2	0.654	1.6895
140	0.763	1.635
140.8	0.654	1.6895
141.6	0.545	1.635
142.4	0.654	1.5805
143.2	0.545	1.635
144	0.654	1.5805
144.8	0.763	1.526
145.6	0.545	1.635
146.4	0.545	1.635
147.2	0.763	1.635
148	0.654	1.6895
148.8	0.654	1.6895
149.6	0.545	1.744
150.4	0.436	1.6895
151.2	0.436	1.6895
152	0.436	1.6895
152.8	0.436	1.6895
153.6	0.545	1.635
154.4	0.545	1.635
155.2	0.436	1.6895
156	0.436	1.6895
156.8	0.436	1.6895
157.6	0.545	1.635
158.4	0.545	1.635
159.2	0.545	1.635
160	0.436	1.5805
160.8	0.545	1.635
161.6	0.436	1.5805
162.4	0.545	1.635
163.2	0.545	1.635
164	0.545	1.635
164.8	0.436	1.6895
165.6	0.545	1.635
166.4	0.545	1.635
167.2	0.545	1.635
168	0.545	1.635
168.8	0.436	1.5805
169.6	0.545	1.635
170.4	0.545	1.635
171.2	0.436	1.5805
172	0.654	1.5805
172.8	0.545	1.526
173.6	0.654	1.5805
174.4	0.654	1.4715
175.2	0.654	1.4715
176	0.872	1.4715
176.8	0.654	1.5805
177.6	0.654	1.5805
178.4	0.763	1.526
179.2	0.545	1.526
180	0.654	1.5805
180.8	0.654	1.5805
181.6	0.763	1.744
182.4	0.436	1.5805
183.2	1.09	1.9075
184	0.545	1.635
184.8	0.763	1.635
185.6	0.545	1.635
186.4	0.545	1.635
187.2	0.654	1.6895
188	0.545	1.635
188.8	0.545	1.635
189.6	0.545	1.635
190.4	0.654	1.6895
191.2	0.545	1.635
192	0.545	1.744
192.8	0.545	1.744
193.6	0.545	1.744
194.4	0.654	1.7985
195.2	0.763	1.853
196	0.654	1.7985
196.8	0.872	1.9075
197.6	0.763	1.853
198.4	0.436	1.6895
199.2	0.545	1.744
200	1.199	2.071
200.8	1.199	2.071
201.6	1.635	2.18
202.4	0.436	1.5805
203.2	1.744	2.2345
204	1.635	2.18
204.8	1.744	2.2345
205.6	1.526	2.2345
206.4	1.635	2.289
207.2	1.417	2.18
208	0.981	1.962
208.8	0.763	1.962
209.6	0.654	1.9075
210.4	0.654	1.9075
211.2	0.763	1.962
212	0.654	1.9075
212.8	0.981	2.071
213.6	1.635	2.289
214.4	0.872	1.9075
215.2	1.962	2.3435
216	1.744	2.3435
216.8	1.199	1.962
217.6	3.161	1.417
218.4	1.744	2.2345
219.2	1.853	2.289
220	1.635	1.962
220.8	1.853	2.289
221.6	3.379	1.526
222.4	1.853	2.289
223.2	1.526	2.2345
224	1.308	2.2345
224.8	1.09	2.3435
225.6	0.981	2.398
226.4	1.308	2.3435
227.2	1.526	2.2345
228	0.763	2.725
228.8	0.436	2.8885
229.6	0.545	2.943
230.4	0.327	2.943
231.2	0.327	2.943
232	0.436	2.9975
232.8	0.436	2.9975
233.6	0.436	2.9975
234.4	0.436	3.1065
235.2	0.436	3.1065
236	0.545	3.052
236.8	0.436	3.1065
237.6	0.654	3.1065
238.4	0.763	3.161
239.2	0.545	3.052

## Sheet: Figure 4J
Time(s)	diameter	dispacement
0	0.654	0
0.8	0.545	-0.0545
1.6	0.654	0
2.4	0.981	0.0545
3.2	0.654	0
4	0.763	0.0545
4.8	0.872	0
5.6	0.545	-0.0545
6.4	0.654	0
7.2	0.654	0
8	0.763	-0.0545
8.8	0.763	-0.0545
9.6	0.763	0.0545
10.4	0.981	-0.0545
11.2	0.763	0.0545
12	0.763	0.0545
12.8	0.654	0
13.6	0.763	-0.0545
14.4	0.872	0
15.2	0.872	0
16	0.872	0
16.8	0.872	0
17.6	0.763	-0.0545
18.4	0.763	-0.0545
19.2	0.654	0
20	0.654	0
20.8	0.654	0
21.6	0.654	0
22.4	0.654	0
23.2	0.872	0
24	0.763	0.0545
24.8	0.872	0
25.6	0.763	0.0545
26.4	0.763	0.0545
27.2	0.654	0
28	0.654	0
28.8	0.654	0
29.6	0.763	0.0545
30.4	0.654	0
31.2	0.654	0.109
32	0.654	0
32.8	0.763	-0.0545
33.6	0.545	0.0545
34.4	0.436	0
35.2	0.436	0
36	0.327	0.0545
36.8	0.436	0.109
37.6	0.327	0.0545
38.4	0.327	0.0545
39.2	0.545	0.0545
40	0.545	0.0545
40.8	0.545	0.0545
41.6	0.545	0.0545
42.4	0.545	0.0545
43.2	0.545	0.0545
44	0.436	0.109
44.8	0.545	0.1635
45.6	0.545	0.1635
46.4	0.545	0.1635
47.2	0.545	0.1635
48	0.545	0.1635
48.8	0.545	0.1635
49.6	0.545	0.1635
50.4	0.654	0.109
51.2	0.545	0.0545
52	0.436	0.109
52.8	0.545	0.0545
53.6	0.545	0.1635
54.4	0.654	0.109
55.2	0.654	0.109
56	0.545	0.1635
56.8	0.654	0.218
57.6	0.763	0.1635
58.4	0.763	0.1635
59.2	0.545	0.1635
60	0.763	0.1635
60.8	0.763	0.1635
61.6	0.763	0.1635
62.4	0.763	0.1635
63.2	0.763	0.1635
64	0.654	0.218
64.8	0.763	0.1635
65.6	0.654	0.218
66.4	0.654	0.218
67.2	0.654	0.218
68	0.654	0.218
68.8	0.436	0.218
69.6	0.654	0.218
70.4	0.872	0.218
71.2	0.872	0.218
72	0.872	0.327
72.8	0.872	0.327
73.6	1.199	0.1635
74.4	1.09	0.218
75.2	1.308	0.109
76	0.981	0.2725
76.8	0.981	0.1635
77.6	0.872	0.218
78.4	0.872	0.109
79.2	0.763	0.2725
80	0.872	0.327
80.8	0.654	0.218
81.6	0.981	0.2725
82.4	0.981	0.3815
83.2	1.09	0.327
84	1.09	0.327
84.8	0.872	0.218
85.6	1.308	0.327
86.4	1.199	0.2725
87.2	1.09	0.327
88	0.981	0.2725
88.8	0.872	0.218
89.6	0.872	0.218
90.4	0.872	0.218
91.2	0.981	0.2725
92	1.199	0.2725
92.8	0.981	0.2725
93.6	0.872	0.218
94.4	0.654	0.109
95.2	0.545	0.1635
96	0.763	0.1635
96.8	0.763	0.1635
97.6	0.763	0.1635
98.4	0.763	0.1635
99.2	0.872	0.218
100	0.872	0.218
100.8	0.872	0.109
101.6	0.872	0.109
102.4	0.872	0.218
103.2	0.763	0.2725
104	0.545	0.2725
104.8	0.763	0.2725
105.6	0.654	0.218
106.4	0.981	0.1635
107.2	0.981	0.1635
108	0.981	0.1635
108.8	0.981	0.1635
109.6	0.981	0.0545
110.4	1.09	0.109
111.2	0.763	0.1635
112	0.763	0.1635
112.8	0.872	0.218
113.6	0.763	0.1635
114.4	1.09	0.109
115.2	0.872	0.109
116	0.436	0.218
116.8	0.981	0.0545
117.6	0.981	0.0545
118.4	0.872	0.109
119.2	0.981	0.0545
120	0.872	0.109
120.8	0.763	0.0545
121.6	0.872	0.109
122.4	0.872	0.109
123.2	0.763	0.1635
124	0.872	0.109
124.8	0.763	0.1635
125.6	0.763	0.1635
126.4	0.981	0.0545
127.2	0.981	0.1635
128	0.872	0.109
128.8	0.763	0.0545
129.6	0.872	0.109
130.4	0.872	0.109
131.2	0.981	0.0545
132	0.872	0.109
132.8	0.981	0.1635
133.6	0.872	0.218
134.4	0.981	0.1635
135.2	0.981	0.1635
136	0.872	0.218
136.8	0.763	0.1635
137.6	0.763	0.1635
138.4	0.872	0.218
139.2	0.763	0.0545
140	0.763	0.1635
140.8	0.654	0.109
141.6	0.872	0.109
142.4	0.654	0.109
143.2	0.545	0.0545
144	0.436	0
144.8	0.654	0
145.6	0.545	0.1635
146.4	0.763	0.0545
147.2	0.654	0.109
148	0.763	0.0545
148.8	0.763	0.0545
149.6	0.763	0.0545
150.4	0.763	0.0545
151.2	0.654	0
152	0.763	0.0545
152.8	0.654	0.109
153.6	0.872	0
154.4	0.763	0.0545
155.2	0.763	0.0545
156	0.872	0
156.8	0.654	0
157.6	0.654	0
158.4	0.654	0
159.2	0.763	-0.0545
160	0.872	0
160.8	0.872	0
161.6	0.872	0
162.4	0.763	0.0545
163.2	0.763	0.0545
164	0.872	0
164.8	0.872	0
165.6	0.763	0.0545
166.4	0.654	0
167.2	0.872	0
168	0.763	-0.0545
168.8	0.763	-0.0545
169.6	0.654	-0.109
170.4	0.545	-0.1635
171.2	0.654	-0.109
172	0.872	-0.109
172.8	0.654	-0.218
173.6	0.545	-0.1635
174.4	0.545	-0.1635
175.2	0.654	-0.109
176	0.545	-0.1635
176.8	0.654	-0.109
177.6	0.763	-0.0545
178.4	0.763	-0.0545
179.2	0.654	-0.109
180	0.872	0
180.8	0.545	-0.1635
181.6	0.872	0
182.4	0.872	0
183.2	1.308	0
184	0.763	-0.0545
184.8	0.872	0
185.6	0.981	0.0545
186.4	0.872	0
187.2	0.872	0
188	0.981	0.0545
188.8	0.981	0.0545
189.6	0.872	0
190.4	1.09	0.109
191.2	0.763	0.0545
192	0.981	0.0545
192.8	0.763	-0.0545
193.6	0.763	0.0545
194.4	0.763	0.0545
195.2	0.981	0.0545
196	0.436	-0.109
196.8	0.436	-0.218
197.6	0.763	0.0545
198.4	0.763	-0.0545
199.2	0.872	0
200	0.763	-0.0545
200.8	0.545	-0.1635
201.6	0.872	0
202.4	0.436	-0.109
203.2	0.872	0
204	0.654	0
204.8	0.654	0
205.6	0.872	0.109
206.4	0.763	0.0545
207.2	0.872	0.109
208	0.654	0.109
208.8	0.763	0.1635
209.6	0.654	0.109
210.4	0.763	0.0545
211.2	0.654	0.109
212	0.654	0.109
212.8	0.654	0.109
213.6	0.545	0.1635
214.4	0.545	0.1635
215.2	0.545	0.1635
216	0.654	0.109
216.8	0.654	0.109
217.6	0.654	0.109
218.4	0.654	0.109
219.2	0.654	0.109
220	0.763	0.0545
220.8	0.654	0
221.6	0.545	-0.0545
222.4	0.872	0
223.2	0.763	0.0545
224	0.872	0
224.8	0.872	0
225.6	0.763	-0.0545
226.4	0.654	0
227.2	0.872	0
228	0.763	0.0545
228.8	0.981	0.0545
229.6	0.981	0.0545
230.4	0.763	0.0545
231.2	0.872	0.109
232	0.981	0.0545
232.8	0.763	0.0545
233.6	1.09	0.109
234.4	0.981	0.1635
235.2	0.981	0.0545
236	0.872	0.109
236.8	0.763	0.0545
237.6	0.872	0
238.4	0.654	0
239.2	0.654	-0.109

## Sheet: Figure 4K
	GIP-2 cluster anterior displacement
No. of worm	WT	unc-116
1	0.997952	0.0683528
2	1.40792	0.0902603
3	0.765552	-0.123035
4	0.505811	-0.0683528
5	0.784706	-0.165152
6	1.02529
	Unpaired t test with Welch's correction
	P value	0.0003
	P value summary	***
	Significantly different (P < 0.05)?	Yes
	One- or two-tailed P value?	Two-tailed
	Welch-corrected t, df	t=7.067, df=6.577

## Sheet: Figure 4L
	GIP-2 cluster diameter change(MAX-MIN)/μm
No. of worm	WT	unc-116
1	3.815	0.981
2	3.161	2.725
3	3.052	2.289
4	1.853	1.417
5	7.412	2.18
6	4.687
7	5.559
	Unpaired t test with Welch's correction
	P value	0.0165
	P value summary	*
	Significantly different (P < 0.05)?	Yes
	One- or two-tailed P value?	Two-tailed
	Welch-corrected t, df	t=3.006, df=8.186

## Sheet: Figure 4-figure supplement 1A
	percentage of Minus-end-out EBP-2 tracks in proximal dendrite
	outgrowing dendrite			mature dendrite
No. of worm	WT-outgrowing	unc-116-outgrowing	Punc-86 rescue	WT-mature	unc-116-mature	ser-2 rescue#1	ser-2 rescue#2	ser-2 rescue#3
1	94.7368	6.66667	71.4286	100	100	77.7778	90.9091	0
2	100	93.3333	71.4286	100	0	0	0	100
3	100	0	45.4545	85.7143	100	0	0	0
4	100	50	23.0769	100	0	100	100	100
5	100	90.9091	36.8421	83.3333	90	77.7778	0	0
6	70	6.45161	0	100	100	0	100	100
7	100	0	0	68.75	85.7143	68.4211	75	0
8	94.1176	0	100	100	16.6667	0	100	3.22581
9	90	0	0	75	0	77.7778	57.1429	0
10	92.5926	0	90	100	0	80	0	0
11	90	0	100	100	0	94.1176	20	91.6667
12		9.09091	79.1667	100	0	75	88.2353	57.8947
13			95.8333	100	0	0	100
14			100		80	78.2609	0
15			83.3333		35	28.5714
16			0		57.1429	0
17					58.3333
18					100
19					9.09091
	outgrowing dendrite
	Compare the mean with a control column
	Dunnett's T3 multiple comparisons test	Mean Diff.	95.00% CI of diff.	Significant?	Summary	Adjusted P Value	B-?
	unc-116-outgrowing vs. WT-outgrowing	-72.4	-103.6 to -41.15	Yes	****	<0.0001	A	WT-outgrowing
	unc-116-outgrowing vs. Punc-86 rescue	-34.66	-73.49 to 4.161	Yes	*	0.0475	C	Punc-86 rescue
	mature dendrite
	Dunnett's T3 multiple comparisons test	Mean Diff.	95.00% CI of diff.	Significant?	Summary	Adjusted P Value	E-?
	unc-116-mature vs. WT-mature	-49.51	-80.94 to -18.07	Yes	***	0.0004	D	WT-mature
	unc-116-mature vs. ser-2 rescue1	-3.57	-44.92 to 37.79	No	ns	0.9984	F	ser-2 rescue1
	unc-116-mature vs. ser-2 rescue2	-8.448	-54.94 to 38.05	No	ns	0.9708	G	ser-2 rescue2
	unc-116-mature vs. ser-2 rescue3	6.054	-44.79 to 56.90	No	ns	0.9934	H	ser-2 rescue3

## Sheet: Figure 4-figure supplement 1C
	unc-116-plus-end-out									unc-116-minus-end-out
distance from dendritic tip(μm)	worm1	worm2	worm3	worm4	worm5	worm6	worm7	worm8	worm9	worm1	worm2	worm3	worm4	worm5	worm6	worm7	worm8	worm9
1.6	0.1	0.0222222	0.0666667	0.0111111	0.0666667	0.0777778	0.0444444	0.0666667	0.0666667	0	0.0222222	0	0	0	0	0	0.0222222	0
3.3	0.1	0.0111111	0.1	0.0333333	0.0555556	0.0888889	0.0777778	0.122222	0.144444	0.0111111	0.0333333	0	0	0	0	0	0.0111111	0
4.9	0.0666667	0.0111111	0.0777778	0.0555556	0.0555556	0.0888889	0.0444444	0.0666667	0.111111	0.0111111	0.0333333	0.0111111	0	0	0	0	0.0111111	0
6.5	0.111111	0.0111111	0.0666667	0.0444444	0.0555556	0.0777778	0.0333333	0.0333333	0.0888889	0	0.0444444	0.0555556	0	0	0	0	0.0111111	0
8.2	0.0888889	0.0111111	0.0888889	0.0444444	0.0444444	0.0888889	0.0333333	0.0222222	0.0777778	0	0.0333333	0.0444444	0	0	0	0	0.0111111	0
9.8	0.0777778	0.0444444	0.1	0.0333333	0.0222222	0.1	0.0444444	0.0333333	0.0555556	0	0.0222222	0.0444444	0	0.0111111	0	0	0.0111111	0.0111111

## Sheet: Figure 4-figure supplement 1D
	No. of EBP-2 tracks/s at outgrowth stage in proximal dendrite
	wt-plus-end-out								wt-minus-end-out								unc-116-plus-end-out												unc-116-minus-end-out
distance from cell body(μm)	worm1	worm2	worm3	worm4	worm5	worm6	worm7		worm1	worm2	worm3	worm4	worm5	worm6	worm7		worm1	worm2	worm3	worm4	worm5	worm6	worm7	worm8	worm9	worm10	worm11		worm1	worm2	worm3	worm4	worm5	worm6	worm7	worm8	worm9	worm10	worm11
-9.8	0	0	0	0	0.025	0	0		0.125	0.0875	0.125	0.1125	0.05	0.025	0.05		0.0666667	0.0777778	0	0.111111	0.0888889	0.0666667	0.1	0.0222222	0.0555556	0.0333333	0		0	0	0.0222222	0	0	0	0	0	0	0	0.0777778
-8.2	0	0	0	0	0.0375	0	0		0.1375	0.075	0.0875	0.1	0.025	0.025	0.05		0.1	0.0777778	0	0.111111	0.0555556	0.0333333	0.144444	0.0555556	0.0444444	0.0555556	0		0	0	0.0111111	0	0	0	0	0	0	0	0.0555556
-6.5	0	0	0	0	0.0375	0	0		0.1125	0.075	0.05	0.05	0.025	0.05	0.05		0.0888889	0.0888889	0	0.0888889	0.0888889	0.0222222	0.122222	0.0555556	0.0333333	0.0555556	0.0222222		0.0111111	0	0	0	0	0	0	0	0	0	0.0666667
-4.9	0	0	0	0	0	0.0125	0.0125		0.0875	0.0375	0.05	0.0375	0.075	0.0625	0.05		0.111111	0.1	0	0.111111	0.0888889	0.0222222	0.0777778	0.1	0.0666667	0.111111	0.0111111		0.0111111	0	0.0222222	0	0	0	0	0	0	0	0.0444444
-3.3	0	0	0.0125	0	0.0125	0.0375	0.025		0.0375	0.0625	0.0625	0.0375	0.075	0.025	0.05		0.144444	0.0555556	0.0222222	0.0777778	0.0777778	0.0222222	0.0777778	0.111111	0.0555556	0.122222	0		0.0111111	0	0.0555556	0	0	0	0	0	0	0	0.0333333
-1.6	0	0	0.025	0	0.0125	0.0375	0.0625		0.0375	0.075	0.075	0.0375	0.05	0.05	0.025		0.0777778	0.0333333	0.0333333	0.0777778	0.0666667	0.0222222	0.1	0.166667	0.0555556	0.1	0.0111111		0	0	0.0333333	0	0	0	0	0	0	0	0.0111111

## Sheet: Figure 4-figure supplement 1E
	GIP-2 localization class(%)
genotype	GC/ anterior dendrite	cell body	posterior dendrite	no GIP-2 cluster
WT	100	0	0	0
unc-116	16	64	4	16

## Sheet: Figure 4-figure supplement 1F
	RAB-11.1 enrichment class(%)
genotype	growth cone enriched	cell body enriched	in the middle of dendrite
WT	100	0	0
unc-116	18	71	11

[truncated: 1 more sheets: Figure 4-figure supplement 2]
