# Supplementary material for: Growth cone-localized microtubule organizing center establishes microtubule orientation in dendrites
Source: eLife. 2020 Jul 13;9:e56547. doi: 10.7554/eLife.56547 (PMC7375809; doi:10.7554/eLife.56547)
Supplement: Figure 5—source data 1. [file elife-56547-fig5-data1.xlsx]

## Sheet: Figure 5B
	No. of MT pause event/s
No. of worm	plus-end-out MTs in GC	minus-end-out MTs	plus-end-out MTs in unc-116 GC
1	0.0642185	0	0.0352871
2	0.0521029	0	0.0489569
3	0.032256	0	0.0477017
4	0.0688397	0	0.0342787
5	0.0680805	0.0226935	0.0199328
6	0.0441248	0.0110312	0.0829256
7			0.0424976
	Dunnett's T3 multiple comparisons test	Mean Diff.	95.00% CI of diff.	Significant?	Summary	Adjusted P Value
	plus-end-out MTs in GC vs. minus-end-out MTs	0.04932	0.02551 to 0.07313	Yes	***	0.0002	A-B
	plus-end-out MTs in GC vs. Column C	0.01043	-0.01995 to 0.04080	No	ns	0.6328	A-C

## Sheet: Figure 5C
	MT pause time(s)
No. of individual event	plus-end-out MTs in GC	minus-end-out MTs	plus-end-out MTs in unc-116 GC
1	7.47448	3.52524	7.93492
2	7.78592	3.23147	15.5864
3	13.7032	3.32391	1.70034
4	8.72023		7.65153
5	9.27652		8.78509
6	10.2362		8.57898
7	20.1524		9.43688
8	15.191		21.4474
9	14.2609		10.8667
10	6.10113		3.71756
11	7.26325		4.86142
12	6.39166		10.5807
13	14.5265		11.7115
14	4.93901		9.36921
15	6.46294		5.56297
16	9.40064		11.1259
17	7.63802		10.5404
18	12.6321		5.25107
19	5.58163		21.296
20	17.2239		16.3367
21	7.85651		12.2525
22	12.3891		9.63238
23	12.6913		6.32125
24			6.02024
25			2.71327
26			4.8236
27			12.6619
28			9.84293
29			4.30628
30			5.84424
31			5.22906
	Dunnett's T3 multiple comparisons test	Mean Diff.	95.00% CI of diff.	Significant?	Summary	Adjusted P Value
	Column A vs. Column B	6.983	4.504 to 9.462	Yes	****	<0.0001	A-B
	Column A vs. Column C	1.247	-2.083 to 4.577	No	ns	0.6664	A-C

## Sheet: Figure 5E
	RAB-11.1 cluster distance from t=0(μm)
Time(s)	paused MT time region	dynamic MT region			dynamic MT time region	paused MT time region	dynamic MT time region	paused MT time region	dynamic MT time region
0	0				0
0.8	0				-0.109
1.6	0.0545				0.0545
2.4	0.1635				0.0545
3.2	0.109				0	0
4	0.218					0.0545
4.8	0.109					0.109
5.6	0.1635					0.327
6.4	0.327	0.327				0.4905
7.2		0.327				0.4905
8		0.327				0.763
8.8		0.327				0.872
9.6		0.327				0.436
10.4		0.2725				0.872
11.2		0.327				0.872	0.872
12		0.4905					0.5995
12.8		0.436					0.981
13.6		0.2725					0.7085
14.4		0.327					0.654
15.2		0.3815					0.872
16		0.436					0.763
16.8		0.327					0.872
17.6		0.327					0.9265
18.4		0.218					0.8175
19.2		0.2725					0.654
20		0.218					1.635
20.8		0.218					0.872
21.6		0.218					0.8175
22.4		0.0545					0.763
23.2		-0.1635					0.9265
24		-0.327					0.981	0.981
24.8		0.3815						0.763
25.6		0						1.635
26.4		-0.109						2.0165
27.2		0.0545						1.7985
28		0.0545						1.6895
28.8		0						1.962
29.6		-0.0545						2.071
30.4		-0.0545						2.18
31.2		0.109						2.0165
32		0.0545						2.071
32.8		0.0545						3.7605
33.6		0.1635						3.706
34.4		-0.327						3.7605
35.2		0.1635						2.0165
36		0.218						3.7605
36.8		0.4905						2.18
37.6		0.3815						2.507
38.4		-0.0545						3.924
39.2		-0.218						3.8695
40		-0.109						4.142
40.8		-0.2725						3.815
41.6		-0.109						3.924
42.4		-0.109						4.033
43.2		-0.327						4.033
44		-0.218						4.033
44.8		-0.109						3.9785
45.6		-0.109						4.142
46.4		0						4.142
47.2		0.0545						4.1965
48		0.0545						4.1965
48.8		0.109						4.1965
49.6		0.218						4.251
50.4		0.1635						4.1965
51.2		0.2725						4.1965
52		0.109						4.1965
52.8		0.1635						4.1965
53.6		0.1635						4.142
54.4		0.4905						4.033
55.2		0.1635						4.0875
56		0.2725						3.9785
56.8		0.1635						3.9785
57.6		0.1635						3.8695
58.4		0.109						3.815
59.2		0.0545						3.815
60		0.0545						3.9785
60.8		0.0545						3.924
61.6		0.0545						3.8695
62.4		-0.0545						3.8695
63.2		0.0545						3.924
64		0.1635						3.8695
64.8		0.763						3.8695
65.6		0.1635						3.8695
66.4		0.109						3.924
67.2		-0.109						3.924	3.924
68		-0.0545							3.815
68.8		-0.109							3.815
69.6		-0.109							3.924
70.4		-0.1635							3.9785
71.2		0							3.7605
72		0.436							3.706
72.8		0.109							3.815
73.6		0.3815							3.8695
74.4		0.7085							3.9785
75.2		-0.109							3.8695
76		-0.109							3.8695
76.8		-0.1635							3.9785
77.6		0							3.9785
78.4		-0.0545							3.9785
79.2		-0.1635							3.924

## Sheet: Figure 5F
No. of movies	Total MT paused time(s)	RAB-11.1 distance from t=0(um)
1	5.6	0.4905
2	8	0.1635
3	8	0.545
4	11.2	0.109
5	20.8	0.8175
6	24.8	0.7085
7	25.6	1.1445
8	29.6	0.9265
9	31.2	0.436
10	32.8	1.7985
11	38.4	1.744
12	40.8	0.9265
13	41.6	1.853
14	42.4	1.7985
15	52	3.924

## Sheet: Figure 5-figure supplement 1A
	RAB-11.1 cluster distance from t=0(μm)
	example-1						example-2										example-3						example-4							example-5					example-6							example-7				example-8
Time(s)	dynamic MT time region	paused MT time region	dynamic MT time region	paused MT time region	dynamic MT time region		Time(s)	paused MT time region	dynamic MT time region	paused MT time region	dynamic MT time region	paused MT time region	dynamic MT time region	paused MT time region	dynamic MT time region		Time(s)	dynamic MT time region	paused MT time region	dynamic MT time region	paused MT time region		Time(s)	dynamic MT time region	paused MT time region	dynamic MT time region	paused MT time region	dynamic MT time region		Time(s)	dynamic MT time region	paused MT time region	dynamic MT time region		Time(s)	dynamic MT time region	paused MT time region	dynamic MT time region	paused MT time region	dynamic MT time region		Time(s)	paused MT time region	dynamic MT time region		Time(s)	dynamic MT time region	paused MT time region	dynamic MT time region
0	0						0	0									0	0					0	0						0	0				0	0						0	0			0	0
0.8	0.109						0.8	-0.0545									0.8	0.0545					0.8	-0.545						0.8	-0.436				0.8	-0.0545						0.8	-0.0545			0.8	0.1635
1.6	0.436						1.6	-0.0545									1.6	0.0545					1.6	-0.109						1.6	0				1.6	0.0545						1.6	-0.1635			1.6	0.109
2.4	0.3815						2.4	-0.109									2.4	0.218					2.4	-0.0545						2.4	-0.109				2.4	0						2.4	-0.2725			2.4	0.109
3.2	0.4905						3.2	0									3.2	0.109					3.2	-0.545						3.2	0.109				3.2	0						3.2	-0.2725			3.2	0.1635
4	0.436						4	-0.0545									4	0.109					4	0.1635						4	0				4	0.0545						4	-0.1635			4	0.218
4.8	0.436						4.8	0									4.8	0.218					4.8	-0.0545						4.8	-0.4905				4.8	0						4.8	-0.1635			4.8	0.1635
5.6	0.545						5.6	0									5.6	0.2725					5.6	0.0545						5.6	0.109				5.6	0.109						5.6	-0.218			5.6	-0.0545
6.4	0.545						6.4	0	0								6.4	0.2725					6.4	0.1635						6.4	0.0545				6.4	0.0545						6.4	-0.218			6.4	0.1635
7.2	0.5995						7.2		0.0545								7.2	0.327					7.2	0.0545						7.2	-0.327				7.2	0						7.2	-0.2725	-0.2725		7.2	0
8	0.545						8		0.109								8	0.218					8	0.0545						8	-0.2725				8	-0.0545						8		-0.218		8	0.109
8.8	0.436	0.436					8.8		0.109								8.8	0.327					8.8	0.1635						8.8	-0.0545				8.8	0.0545						8.8		0.109		8.8	0.109
9.6		0.8175					9.6		0.218								9.6	0.3815	0.3815				9.6	0.218						9.6	-0.109				9.6	0						9.6		-0.2725		9.6	0.109
10.4		0.654					10.4		0.436								10.4		0.3815				10.4	0.1635						10.4	-0.109				10.4	-0.0545						10.4		-0.327		10.4	-0.1635
11.2		0.8175					11.2		0.436								11.2		0.3815				11.2	0.0545						11.2	-0.218				11.2	-0.0545						11.2		-0.218		11.2	-0.218
12		0.8175					12		0.4905								12		0.109				12	0.0545						12	-0.4905				12	-0.0545						12		-0.2725		12	0.545
12.8		0.9265					12.8		0.436								12.8		0.1635				12.8	0.1635						12.8	-0.327				12.8	0						12.8		-0.327		12.8	-0.2725
13.6		0.9265					13.6		0.327								13.6		0				13.6	0.1635						13.6	-0.3815				13.6	0						13.6		-0.327		13.6	-0.2725
14.4		0.763					14.4		0.3815								14.4		0.109				14.4	0.2725	0.2725					14.4	-0.436				14.4	-0.0545						14.4		-0.2725		14.4	0.0545
15.2		1.1445					15.2		0.436								15.2		0.109				15.2		0.545					15.2	-0.218				15.2	-0.0545	-0.0545					15.2		-0.327		15.2	-0.1635
16		1.0355					16		0.327								16		0.218				16		0.7085					16	-0.2725				16		-0.0545					16		-0.2725		16	0.4905
16.8		1.1445					16.8		0.327								16.8		0.327				16.8		0.654					16.8	-0.545				16.8		-0.109					16.8		-0.2725		16.8	-0.2725	-0.2725
17.6		1.1445					17.6		0.327								17.6		0.218				17.6		0.327					17.6	-0.436				17.6		-0.109					17.6		-0.4905		17.6		0.3815
18.4		1.09					18.4		0.327								18.4		0.2725				18.4		0.763					18.4	-0.545				18.4		-0.109					18.4		-0.436		18.4		-0.218
19.2		0.436					19.2		0.327								19.2		0.327				19.2		0.327					19.2	-0.1635				19.2		-0.1635					19.2		-0.1635		19.2		0.1635
20		0.5995					20		0.2725								20		0.218				20		0.763					20	-0.327				20		-0.109					20		-0.1635		20		-0.218
20.8		0.436					20.8		0.109								20.8		0.2725	0.2725			20.8		0.3815					20.8	-0.0545				20.8		-0.1635					20.8		-0.109		20.8		0.0545
21.6		0.327					21.6		0.327								21.6			0.327			21.6		0.109					21.6	-0.218				21.6		-0.0545					21.6		-0.1635		21.6		0.1635
22.4		0.3815					22.4		0.3815								22.4			0.2725			22.4		0.4905					22.4	-0.327				22.4		-0.0545					22.4		-0.2725		22.4		0.218
23.2		0.436					23.2		0.327								23.2			0.218			23.2		0.436					23.2	-0.1635				23.2		-0.0545					23.2		-0.2725		23.2		0.1635
24		1.0355					24		0.436								24			0.2725			24		0.5995					24	-0.218				24		-0.109					24		-0.2725		24		0.327
24.8		1.0355					24.8		0.3815								24.8			0.2725			24.8		0.981					24.8	-0.0545				24.8		0					24.8		-0.218		24.8		0.327
25.6		1.09					25.6		0.436								25.6			0.218			25.6		0.545					25.6	-0.109				25.6		-0.1635					25.6		-0.327		25.6		0.327
26.4		1.0355					26.4		0.3815								26.4			0.2725			26.4		0.981					26.4	-0.2725				26.4		0					26.4		-0.4905		26.4		0.327
27.2		1.09					27.2		0.3815								27.2			0.327			27.2		0.436					27.2	-0.0545				27.2		-0.0545					27.2		-0.2725		27.2		0.3815
28		1.09	1.09				28		0.3815	0.3815							28			0.2725			28		0.872					28	-0.2725				28		0.0545					28		-0.218		28		0.3815
28.8			0.981				28.8			0.327							28.8			0.2725			28.8		0.9265					28.8	-0.0545				28.8		-0.0545					28.8		-0.8175		28.8		0.3815
29.6			1.0355				29.6			0.3815							29.6			0.327			29.6		1.2535					29.6	-0.109				29.6		0.109					29.6		-0.2725		29.6		0.218
30.4			1.0355				30.4			0.3815							30.4			0.327			30.4		1.2535					30.4	-0.2725				30.4		-0.0545					30.4		-0.5995		30.4		0.3815
31.2			0.981				31.2			0.3815							31.2			0.2725			31.2		1.1445					31.2	-0.327				31.2		0.0545	0.0545				31.2		-0.3815		31.2		0.327
32			0.9265				32			0.327							32			0.2725			32		1.2535					32	0				32			0.0545				32		-0.327		32		0.3815
32.8			0.872				32.8			0.3815							32.8			0.436			32.8		0.436					32.8	-0.1635				32.8			0.109				32.8		-0.3815		32.8		0.3815
33.6			0.872				33.6			0.3815							33.6			0.3815			33.6		1.199					33.6	-0.218	-0.218			33.6			0.0545				33.6		-0.545		33.6		0.327
34.4			0.872				34.4			0.327							34.4			0.327			34.4		1.2535					34.4		-0.2725			34.4			0.0545				34.4		-0.5995		34.4		0.2725
35.2			0.763				35.2			0.3815							35.2			0.3815			35.2		1.1445					35.2		-0.327			35.2			0				35.2		-0.5995		35.2		0.2725
36			0.7085				36			0.327							36			0.327			36		1.2535					36		-0.109			36			0				36		-0.4905		36		0.2725
36.8			0.872				36.8			0.2725	0.2725						36.8			0.3815			36.8		1.308					36.8		-0.0545			36.8			0.0545				36.8		-0.436		36.8		0.2725
37.6			0.8175				37.6				0.327						37.6			0.327			37.6		1.308					37.6		-0.1635			37.6			0.109				37.6		-0.4905		37.6		0.2725
38.4			0.763				38.4				0.436						38.4			0.3815			38.4		1.3625					38.4		-0.763			38.4			0.109				38.4		-0.4905		38.4		0.7085
39.2			0.981				39.2				0.4905						39.2			0.327			39.2		1.199					39.2		-0.4905			39.2			0.109				39.2		-0.545		39.2		0.654
40			1.09				40				0.4905						40			0.3815			40		1.417					40		-0.327			40			0.1635				40		-0.436		40		0.3815
40.8			1.09				40.8				0.436						40.8			0.436			40.8		1.3625					40.8		-0.3815			40.8			0.1635				40.8		-0.436		40.8		0.2725
41.6			0.981	0.981			41.6				0.327	0.2725					41.6			0.3815			41.6		1.2535					41.6		-0.436			41.6			0.218				41.6		-0.4905		41.6		0.2725
42.4				0.981			42.4					0.327					42.4			0.3815			42.4		1.308					42.4		-0.3815			42.4			0.218				42.4		-0.327		42.4		0.545
43.2				0.981			43.2					0.436					43.2			0.3815			43.2		1.199					43.2		-0.3815			43.2			0.218				43.2		-0.327		43.2		0.545
44				0.981			44					0.4905					44			0.3815			44		1.417					44		-0.436	-0.436		44			0.218				44		-0.436		44		0.654
44.8				1.09			44.8					0.4905					44.8			0.327			44.8		1.2535					44.8			-0.2725		44.8			0.218				44.8		-0.2725		44.8		0.7085
45.6				1.199			45.6					0.436					45.6			0.436			45.6		1.199					45.6			-0.2725		45.6			0.2725				45.6		-0.327		45.6		0.763	0.763
46.4				1.2535			46.4					0.327	0.3815				46.4			0.436			46.4		1.199					46.4			-0.109		46.4			0.327				46.4		-0.327		46.4			0.763
47.2				1.308			47.2						0.3815				47.2			0.436			47.2		1.2535	1.2535				47.2			-0.109		47.2			0.327				47.2		-0.1635		47.2			0.5995
48				1.0355			48						0.3815				48			0.436			48			1.199				48			-0.3815		48			0.3815				48		-0.218		48			0.763
48.8				1.09			48.8						0.2725				48.8			0.436			48.8			1.2535				48.8			-0.0545		48.8			0.3815				48.8		-0.218		48.8			0.7085
49.6				0.981			49.6						0.2725				49.6			0.436			49.6			1.199				49.6			-0.436		49.6			0.3815				49.6		-0.218		49.6			0.763
50.4				1.0355			50.4						0.218				50.4			0.4905	0.4905		50.4			1.199				50.4			-0.436		50.4			0.4905				50.4		-0.109		50.4			0.327
51.2				0.9265			51.2						0.2725				51.2				0.4905		51.2			1.308				51.2			0.109		51.2			0.436				51.2		-0.218		51.2			0.4905
52				1.1445			52						0.2725				52				0.436		52			1.199				52			0.218		52			0.3815				52		-0.2725		52			0.654
52.8				1.0355			52.8						0.2725	0.2725			52.8				0.5995		52.8			1.2535				52.8			-0.218		52.8			0.436				52.8		-0.2725		52.8			0.2725
53.6				1.199			53.6							0.327			53.6				0.5995		53.6			1.2535				53.6			-0.0545		53.6			0.4905				53.6		-0.2725		53.6			0.3815
54.4				1.3625			54.4							0.3815			54.4				0.5995		54.4			1.2535				54.4			-0.5995		54.4			0.545				54.4		-0.3815		54.4			0.4905
55.2				1.308			55.2							0.327			55.2				0.7085		55.2			1.308				55.2			-0.327		55.2			0.545				55.2		-0.218		55.2			0.327
56				1.2535			56							0.218			56				0.654		56			1.2535				56			-0.109		56			0.5995				56		-0.327		56			0.2725
56.8				1.308			56.8							0.2725			56.8				0.5995		56.8			1.308				56.8			-0.1635		56.8			0.545				56.8		-0.2725		56.8			0.2725
57.6				1.199			57.6							0.2725			57.6				0.7085		57.6			0.2725				57.6			-0.3815		57.6			0.545				57.6		-0.2725		57.6			0.763
58.4				1.308			58.4							0.2725			58.4				0.7085		58.4			1.308				58.4			0		58.4			0.545				58.4		-0.218		58.4			0.5995
59.2				1.3625			59.2							0.327			59.2				0.7085		59.2			1.2535				59.2			-0.2725		59.2			0.4905				59.2		-0.3815		59.2			0.3815
60				1.417			60							0.327			60				0.7085		60			1.1445				60			0.327		60			0.4905				60		-0.327		60			0.654
60.8				1.417			60.8							0.3815			60.8				0.763		60.8			1.2535				60.8			-0.2725		60.8			0.4905				60.8		-0.3815		60.8			0.7085
61.6				1.526			61.6							0.3815			61.6				0.763		61.6			1.1445				61.6			-0.4905		61.6			0.5995				61.6		-0.3815		61.6			0.8175
62.4				1.6895			62.4							0.3815			62.4				0.872		62.4			1.199				62.4			-0.327		62.4			0.654				62.4		-0.3815		62.4			0.218
63.2				1.635			63.2							2.1255			63.2				0.9265		63.2			1.1445	1.1445			63.2			-0.436		63.2			0.545	0.545			63.2		-0.327		63.2			0.763
64				1.744	1.744		64							2.0165			64				0.981		64				1.1445			64			-0.545		64				0.327			64		-0.327		64			0.545
64.8					1.6895		64.8							1.853			64.8				0.981		64.8				1.199			64.8			-0.0545		64.8				0.5995			64.8		-0.2725		64.8			0.5995
65.6					1.526		65.6							1.853			65.6				1.0355		65.6				1.1445			65.6			-0.436		65.6				0.545			65.6		-0.327		65.6			1.0355
66.4					1.417		66.4							1.9075			66.4				1.09		66.4				1.1445			66.4			-0.654		66.4				0.327			66.4		-0.545		66.4			0.9265
67.2					1.3625		67.2							1.7985			67.2				1.1445		67.2				1.2535			67.2			-0.5995		67.2				0.654			67.2		-0.327		67.2			0.9265
68					1.2535		68							1.417			68				1.0355		68				1.2535			68			-0.4905		68				0.436			68		-0.545		68			0.9265
68.8					1.3625		68.8							1.962			68.8				1.09		68.8				1.2535			68.8			-0.436		68.8				0.8175			68.8		-0.545		68.8			1.0355
69.6					1.5805		69.6							1.526	1.526		69.6				1.1445		69.6				1.308			69.6			-0.5995		69.6				0.8175			69.6		-0.545		69.6			0.981
70.4					1.635		70.4								1.635		70.4				0.872		70.4				1.308			70.4			-0.4905		70.4				0.654			70.4		-0.436		70.4			1.0355
71.2					1.5805		71.2								2.1255		71.2				0.9265		71.2				1.417			71.2			-0.218		71.2				0.4905	0.4905		71.2		-0.4905		71.2			0.8175
72					1.5805		72								1.853		72				1.09		72				1.417			72			-0.327		72					0.436		72		-0.436		72			0.981
72.8					1.5805		72.8								2.0165		72.8				1.2535		72.8				1.417			72.8			-0.109		72.8					0.545		72.8		-0.545		72.8			0.872
73.6					1.526		73.6								2.071		73.6				1.199		73.6				1.3625			73.6			-0.2725		73.6					0.545		73.6		-0.3815		73.6			0.872
74.4					1.5805		74.4								1.6895		74.4				1.0355		74.4				1.5805	1.5805		74.4			-0.109		74.4					0.7085		74.4		-0.436		74.4			0.981
75.2					1.744		75.2								1.962		75.2				1.2535		75.2					1.635		75.2			0.0545		75.2					0.654		75.2		-0.218		75.2			0.872
76					1.744		76								1.744		76				1.2535		76					1.6895		76			0.0545		76					0.545		76		-0.436		76			0.981
76.8					1.6895		76.8								1.7985		76.8				0.7085		76.8					1.2535		76.8			0.0545		76.8					0.109		76.8		-0.436		76.8			0.981
77.6					1.6895												77.6				0.981		77.6					1.308		77.6			-0.109		77.6					0.3815		77.6		-0.545		77.6			0.981
78.4					1.962												78.4				0.763		78.4					1.308		78.4			-0.218		78.4					0.436		78.4		-0.545		78.4			1.0355
79.2					1.853												79.2				0.9265		79.2					1.744		79.2			-0.109		79.2					0.7085		79.2		-0.545		79.2			1.1445
