# Supplementary material for: Growth cone-localized microtubule organizing center establishes microtubule orientation in dendrites
Source: eLife. 2020 Jul 13;9:e56547. doi: 10.7554/eLife.56547 (PMC7375809; doi:10.7554/eLife.56547)
Supplement: Figure 6—source data 1. [file elife-56547-fig6-data1.xlsx]

## Sheet: Figure 6C
	GC/ anterior dendrite	cell body	posterior dendrite	no GIP-2 cluster
WT	100	0	0	0
dhc-1	29	34	7	30

## Sheet: Figure 6D
	distance between GIP-2 cluster center and dendritic tip(μm)
No. of worm	WT	dhc-1
1	6.54	10.246
2	1.962	4.796
3	3.815	9.81
4	1.199	20.928
5	2.289	8.502
6	2.616	6.649
7	2.289	6.213
8	1.526	5.559
9	3.815	9.592
10	6.758	11.445
11	6.649	10.464
12	3.706	4.36
13	3.052	24.089
14	7.63
15	3.815
16	9.047
17	5.995
18	7.303
19	5.014
20	7.194
	Unpaired t test with Welch's correction
	P value	0.0059
	P value summary	**
	Significantly different (P < 0.05)?	Yes
	One- or two-tailed P value?	Two-tailed
	Welch-corrected t, df	t=3.224, df=14.46

## Sheet: Figure 6G
Time	GIP-2 cluster diameter(μm)	GIP-2 cluster distance from t=0(μm)
0	0.545	0
0.8	0.545	0
1.6	1.635	0.436
2.4	1.853	0.327
3.2	1.526	0.3815
4	1.09	-0.0545
4.8	1.09	0.1635
5.6	0.763	-0.109
6.4	0.436	-0.0545
7.2	0.436	0.0545
8	0.436	0.0545
8.8	0.327	0.109
9.6	0.436	0.1635
10.4	0.654	0.1635
11.2	0.436	0.1635
12	0.436	0.1635
12.8	0.327	0
13.6	0.436	0.0545
14.4	0.436	0.0545
15.2	0.545	0
16	0.654	-0.0545
16.8	0.654	0.0545
17.6	0.763	0
18.4	0.327	-0.109
19.2	0.436	-0.1635
20	0.545	-0.218
20.8	0.763	-0.109
21.6	0.436	-0.1635
22.4	0.327	-0.109
23.2	0.436	-0.0545
24	0.436	0.0545
24.8	0.654	0.0545
25.6	0.654	0.1635
26.4	0.763	0.218
27.2	0.763	0.109
28	1.853	0.436
28.8	0.981	0.218
29.6	1.744	0.5995
30.4	1.962	0.8175
31.2	2.18	0.9265
32	2.071	0.981
32.8	1.526	1.0355
33.6	0.436	0.9265
34.4	0.545	0.981
35.2	0.327	1.09
36	0.545	1.09
36.8	0.545	1.09
37.6	0.654	1.0355
38.4	0.981	1.199
39.2	0.327	1.308
40	0.545	1.308
40.8	0.545	1.417
41.6	0.545	1.417
42.4	0.981	1.308
43.2	0.545	1.199
44	0.763	1.199
44.8	0.872	1.1445
45.6	0.654	1.1445
46.4	0.763	1.308
47.2	0.872	1.2535
48	0.981	1.199
48.8	1.635	0.981
49.6	0.981	1.199
50.4	0.981	1.09
51.2	0.763	0.763
52	0.654	0.8175
52.8	0.436	1.0355
53.6	2.398	0.0545
54.4	0.436	0.9265
55.2	0.436	0.9265
56	0.218	0.9265
56.8	0.327	0.872
57.6	0.545	0.763
58.4	0.545	0.654
59.2	3.052	-0.5995
60	3.052	1.6895
60.8	1.526	1.1445
61.6	0.545	0.654
62.4	0.436	0.7085
63.2	1.09	0.9265
64	2.834	-0.4905
64.8	4.905	0.654
65.6	2.943	1.526
66.4	1.526	0.1635
67.2	4.905	0.654
68	2.725	1.635
68.8	0.654	0.7085
69.6	0.327	0.981
70.4	0.327	0.981
71.2	0.327	1.09
72	0.436	1.1445
72.8	0.327	1.199
73.6	0.327	1.308
74.4	0.436	1.3625
75.2	0.545	1.417
76	0.545	1.417
76.8	0.654	1.5805
77.6	0.654	1.7985
78.4	1.635	1.962
79.2	0.218	1.6895
80	0.436	1.9075
80.8	0.981	2.071
81.6	0.654	2.0165
82.4	1.308	2.3435
83.2	1.308	2.3435
84	1.308	2.3435
84.8	1.308	2.3435
85.6	1.308	2.3435
86.4	1.09	2.3435
87.2	1.09	2.4525
88	0.872	2.4525
88.8	2.18	1.7985
89.6	1.09	2.2345
90.4	0.981	2.289
91.2	0.872	2.3435
92	4.251	0.981
92.8	4.251	1.09
93.6	1.417	2.616
94.4	1.09	2.5615
95.2	1.09	2.6705
96	4.251	1.09
96.8	1.526	2.3435
97.6	3.924	1.1445
98.4	4.033	1.09
99.2	1.308	2.4525
100	1.635	2.18
100.8	1.744	2.2345
101.6	0.981	2.507
102.4	1.853	2.289
103.2	4.36	1.1445
104	4.796	1.1445
104.8	5.014	1.1445
105.6	4.469	1.199
106.4	4.796	1.1445
107.2	4.469	1.417
108	4.469	1.199
108.8	4.905	1.199
109.6	4.687	1.09
110.4	5.45	1.4715
111.2	0.872	2.2345
112	2.071	2.507
112.8	5.232	1.0355
113.6	2.18	2.4525
114.4	5.123	1.199
115.2	1.635	2.943
116	4.36	1.4715
116.8	5.014	1.9075
117.6	4.905	1.853
118.4	1.635	3.379
119.2	1.635	3.488
120	5.777	1.526
120.8	2.616	3.2155
121.6	5.341	1.526
122.4	1.199	3.27
123.2	1.09	3.2155
124	5.123	1.744
124.8	4.36	2.1255
125.6	1.635	3.379
126.4	1.635	3.27
127.2	2.071	3.488
128	1.199	3.161
128.8	3.379	1.962
129.6	0.872	3.2155
130.4	0.872	3.2155
131.2	0.872	3.2155
132	0.872	3.2155
132.8	0.654	3.2155
133.6	0.981	3.052
134.4	0.763	3.27
135.2	0.654	3.3245
136	0.763	3.27
136.8	0.436	3.2155
137.6	2.398	2.3435
138.4	2.398	2.3435
139.2	2.398	2.4525
140	2.834	2.3435
140.8	0.545	3.488
141.6	0.872	3.5425
142.4	2.834	2.5615
143.2	3.597	2.18
144	1.199	3.379
144.8	0.327	3.27
145.6	0.981	3.706
146.4	0.872	3.6515
147.2	2.507	2.834
148	0.327	3.379
148.8	2.398	2.7795
149.6	0.327	3.27
150.4	0.436	3.2155
151.2	0.763	2.943
152	1.308	3.3245
152.8	0.545	2.834
153.6	1.308	3.3245
154.4	1.308	3.2155
155.2	1.199	3.379
156	1.635	3.488
156.8	1.526	3.5425
157.6	1.526	3.4335
158.4	0.545	3.161
159.2	0.436	2.9975
160	0.545	3.161
160.8	0.436	3.2155
161.6	0.545	3.27
162.4	0.436	3.2155
163.2	0.545	3.27
164	0.545	3.27
164.8	0.436	3.3245
165.6	0.436	3.2155
166.4	0.436	3.2155
167.2	0.327	3.27
168	0.436	3.3245
168.8	0.436	3.2155
169.6	0.436	3.2155
170.4	0.436	3.2155
171.2	0.545	3.161
172	0.436	3.2155
172.8	0.545	3.161
173.6	0.654	3.2155
174.4	0.654	3.2155
175.2	0.763	3.161
176	0.763	3.161
176.8	0.763	3.161
177.6	1.744	3.6515
178.4	2.289	4.033
179.2	0.654	3.2155
180	1.635	3.706
180.8	0.763	3.27
181.6	0.872	3.3245
182.4	0.763	3.27
183.2	0.763	3.27
184	0.763	3.27
184.8	0.654	3.2155
185.6	0.436	3.1065
186.4	0.327	3.052
187.2	0.327	3.052
188	0.327	3.161
188.8	0.436	3.2155
189.6	0.436	3.2155
190.4	0.545	3.27
191.2	0.436	3.3245
192	0.436	3.2155
192.8	0.436	3.1065
193.6	0.436	3.1065
194.4	0.327	3.161
195.2	0.654	3.2155
196	0.436	3.2155
196.8	0.436	3.2155
197.6	0.545	3.27
198.4	0.545	3.27
199.2	0.545	3.27
200	0.545	3.27
200.8	0.436	3.3245
201.6	0.436	3.3245
202.4	0.545	3.379
203.2	0.436	3.4335
204	0.327	3.379
204.8	0.436	3.4335
205.6	0.436	3.4335
206.4	0.654	3.5425
207.2	0.327	3.488
208	0.436	3.4335
208.8	0.654	3.5425
209.6	0.654	3.6515
210.4	0.436	3.5425
211.2	0.545	3.597
212	0.436	3.5425
212.8	0.436	3.5425
213.6	0.545	3.597
214.4	0.327	3.597
215.2	0.327	3.597
216	0.327	3.597
216.8	0.436	3.6515
217.6	0.545	3.706
218.4	0.654	3.7605
219.2	0.545	3.706
220	0.654	3.7605
220.8	0.327	3.597
221.6	0.654	3.7605
222.4	0.872	3.7605
223.2	0.763	3.706
224	0.763	3.706
224.8	0.654	3.6515
225.6	0.872	3.7605
226.4	0.872	3.6515
227.2	0.981	3.706
228	0.872	3.6515
228.8	1.744	4.3055
229.6	0.763	3.706
230.4	1.308	3.9785
231.2	1.417	4.033
232	1.853	4.251
232.8	2.071	4.142
233.6	1.744	4.1965
234.4	1.635	4.251
235.2	1.635	4.251
236	1.417	4.251
236.8	1.417	4.033
237.6	1.308	3.9785
238.4	1.526	3.9785
239.2	1.308	3.9785

## Sheet: Figure 6H
Time(s)	GIP-2 cluster diameter(μm)	GIP-2 cluster distance from t=0(μm)
0	0.545	0
0.8	0.545	0
1.6	0.436	0.0545
2.4	0.545	0
3.2	0.545	0.109
4	0.763	0.109
4.8	0.545	0.109
5.6	0.545	0.109
6.4	0.436	0.1635
7.2	0.545	0.218
8	0.654	0.2725
8.8	0.654	0.2725
9.6	0.654	0.2725
10.4	0.436	0.2725
11.2	0.545	0.218
12	0.654	0.2725
12.8	0.763	0.327
13.6	0.872	0.2725
14.4	0.981	0.327
15.2	0.654	0.1635
16	0.545	0.218
16.8	0.654	0.1635
17.6	0.763	0.218
18.4	0.872	0.2725
19.2	0.981	0.218
20	0.763	0.327
20.8	0.763	0.327
21.6	0.545	0.218
22.4	0.545	0.218
23.2	0.545	0.327
24	0.436	0.3815
24.8	0.436	0.3815
25.6	0.436	0.4905
26.4	0.436	0.4905
27.2	0.545	0.545
28	0.436	0.5995
28.8	0.545	0.545
29.6	0.436	0.4905
30.4	0.436	0.5995
31.2	0.327	0.654
32	0.327	0.654
32.8	0.545	0.545
33.6	0.436	0.5995
34.4	0.327	0.654
35.2	0.327	0.654
36	0.545	0.654
36.8	0.436	0.7085
37.6	0.436	0.7085
38.4	0.436	0.7085
39.2	0.436	0.7085
40	0.545	0.763
40.8	0.436	0.8175
41.6	0.436	0.8175
42.4	0.545	0.763
43.2	0.545	0.763
44	0.872	0.9265
44.8	0.436	0.8175
45.6	0.436	0.7085
46.4	0.654	0.7085
47.2	0.545	0.654
48	0.545	0.763
48.8	0.545	0.763
49.6	0.545	0.763
50.4	0.545	0.872
51.2	0.545	0.872
52	0.763	0.872
52.8	0.872	0.9265
53.6	0.981	1.09
54.4	0.981	1.09
55.2	1.199	1.09
56	1.199	1.308
56.8	0.763	1.09
57.6	0.763	0.872
58.4	0.545	0.981
59.2	0.763	0.872
60	0.981	0.981
60.8	1.09	1.0355
61.6	0.981	1.09
62.4	0.872	1.1445
63.2	0.872	1.1445
64	0.763	1.09
64.8	1.09	1.1445
65.6	1.308	1.2535
66.4	1.635	1.09
67.2	1.308	1.2535
68	1.526	1.2535
68.8	1.526	1.2535
69.6	1.635	1.308
70.4	1.744	1.3625
71.2	2.071	1.526
72	2.289	1.526
72.8	2.616	1.4715
73.6	2.725	1.417
74.4	3.27	1.3625
75.2	3.924	1.3625
76	4.033	1.308
76.8	3.706	1.5805
77.6	3.597	1.526
78.4	3.379	1.526
79.2	3.161	1.308
80	3.052	1.2535
80.8	3.379	0.872
81.6	3.161	0.872
82.4	2.834	0.9265
83.2	3.052	0.9265
84	3.161	0.872
84.8	2.834	0.8175
85.6	2.725	0.763
86.4	2.616	0.8175
87.2	2.725	0.763
88	2.616	0.8175
88.8	2.616	0.7085
89.6	2.18	0.8175
90.4	1.744	0.5995
91.2	1.635	0.545
92	1.526	0.3815
92.8	1.199	0.327
93.6	0.763	0.436
94.4	1.199	0.327
95.2	1.199	0.327
96	1.308	0.1635
96.8	1.199	0.327
97.6	1.635	0.436
98.4	1.635	0.218
99.2	3.161	0.327
100	1.635	0
100.8	1.853	0.218
101.6	1.853	0.218
102.4	1.962	0.1635
103.2	1.962	0.0545
104	1.417	-0.109
104.8	1.526	-0.1635
105.6	1.635	-0.218
106.4	1.962	-0.0545
107.2	1.635	-0.327
108	1.962	-0.4905
108.8	1.962	-0.2725
109.6	1.853	-0.327
110.4	5.232	-1.4715
111.2	2.289	0.109
112	2.18	0.0545
112.8	2.398	0.0545
113.6	1.853	0.109
114.4	2.071	0
115.2	1.635	0.218
116	4.142	-1.0355
116.8	4.578	-1.0355
117.6	5.123	-1.308
118.4	5.123	-1.199
119.2	4.905	-1.199
120	5.559	-0.872
120.8	4.796	-0.8175
121.6	5.123	-0.981
122.4	5.668	-0.8175
123.2	5.341	-0.981
124	5.232	-1.0355
124.8	2.725	0.327
125.6	3.161	0.436
126.4	1.526	0.0545
127.2	2.18	0.0545
128	2.071	-0.109
128.8	1.962	0.1635
129.6	1.199	0.327
130.4	1.417	0.218
131.2	1.417	0.218
132	1.526	0.2725
132.8	1.744	0.1635
133.6	1.526	0.2725
134.4	1.635	0.218
135.2	1.199	0.436
136	0.981	0.545
136.8	1.09	0.5995
137.6	1.199	0.545
138.4	0.654	0.5995
139.2	0.981	0.545
140	0.872	0.5995
140.8	0.872	0.4905
141.6	0.981	0.545
142.4	0.763	0.545
143.2	0.872	0.4905
144	0.436	0.7085
144.8	0.763	0.545
145.6	0.763	0.545
146.4	0.763	0.436
147.2	0.872	0.4905
148	0.872	0.4905
148.8	1.09	0.5995
149.6	0.981	0.654
150.4	0.872	0.5995
151.2	0.654	0.5995
152	1.09	0.3815
152.8	1.417	0.327
153.6	0.981	0.545
154.4	1.635	0.327
155.2	1.308	0.3815
156	1.199	0.436
156.8	0.872	0.4905
157.6	1.417	0.218
158.4	0.981	0.327
159.2	1.09	0.2725
160	1.526	-0.0545
160.8	1.308	-0.0545
161.6	1.417	-0.109
162.4	1.635	-0.218
163.2	1.308	-0.1635
164	4.033	-1.526
164.8	1.308	-0.0545
165.6	1.417	-0.218
166.4	1.199	-0.218
167.2	1.199	-0.109
168	1.199	-0.109
168.8	1.199	-0.109
169.6	1.308	-0.2725
170.4	1.308	-0.2725
171.2	1.199	-0.327
172	1.417	-0.327
172.8	1.417	-0.436
173.6	1.417	-0.436
174.4	1.417	-0.545
175.2	1.417	-0.545
176	1.417	-0.545
176.8	1.526	-0.4905
177.6	1.417	-0.436
178.4	0.981	-0.218
179.2	1.308	-0.4905
180	2.18	-0.8175
180.8	0.981	-0.436
181.6	1.962	-0.9265
182.4	0.981	-0.327
183.2	0.545	-0.327
184	0.872	-0.2725
184.8	1.635	-0.109
185.6	0.981	-0.218
186.4	1.09	-0.1635
187.2	0.872	0.0545
188	1.09	-0.0545
188.8	2.289	-0.654
189.6	1.308	-0.1635
190.4	1.308	-0.3815
191.2	1.308	-0.3815
192	1.199	-0.436
192.8	1.526	-0.5995
193.6	1.526	-0.5995
194.4	1.635	-0.545
195.2	1.635	-0.545
196	1.199	-0.327
196.8	0.872	-0.1635
197.6	0.981	-0.218
198.4	1.09	-0.2725
199.2	2.18	-0.8175
200	1.308	-0.2725
200.8	1.526	-0.3815
201.6	1.635	-0.436
202.4	1.744	-0.3815
203.2	2.398	-0.7085
204	2.18	-0.7085
204.8	1.962	-0.7085
205.6	3.597	-1.417
206.4	3.597	-1.417
207.2	2.289	-0.872
208	2.398	-0.9265
208.8	2.289	-0.981
209.6	2.398	-0.9265
210.4	1.744	-1.2535
211.2	2.398	-0.9265
212	1.744	-1.1445
212.8	1.962	-0.9265
213.6	1.744	-1.1445
214.4	1.744	-1.1445
215.2	1.744	-1.1445
216	1.853	-1.199
216.8	1.853	-1.09
217.6	2.398	-0.7085
218.4	1.853	-1.09
219.2	1.962	-1.0355
220	3.488	-1.3625
220.8	4.687	-1.199
221.6	3.27	-0.2725
222.4	3.379	-1.417
223.2	2.18	-0.7085
224	1.526	-0.9265
224.8	1.744	-0.8175
225.6	2.289	-0.545
226.4	1.853	-0.545
227.2	1.962	-0.5995
228	1.744	-0.4905
228.8	3.815	-1.308
229.6	2.289	-0.545
230.4	1.417	-0.654
231.2	3.597	-0.109
232	1.199	-0.654
232.8	1.962	-0.5995
233.6	1.526	-0.4905
234.4	1.199	-0.436
235.2	1.635	-0.218
236	0.654	-0.7085
236.8	0.654	-0.7085
237.6	0.981	-0.327
238.4	1.635	-0.109
239.2	0.872	-0.4905

## Sheet: Figure 6I
	GIP-2 cluster anterior displacement(μm/min)
No. of worm	WT	dhc-1
1	0.997952	-0.123035
2	1.40792	0
3	0.765552	0.0136706
4	0.505811	1.0663
5	0.784706	0.259741
6	1.02529	0.792893
7		0.328094
	Unpaired t test with Welch's correction
	P value	0.0185
	P value summary	*
	Significantly different (P < 0.05)?	Yes
	One- or two-tailed P value?	Two-tailed
	Welch-corrected t, df	t=2.780, df=10.60

## Sheet: Figure 6J
	Normalized GIP-2 cluster max intensity
	WT							dhc-1
time	worm1	worm2	worm3	worm4	worm5	worm6	worm7	worm1	worm2	worm3	worm4	worm5	worm6	worm7
0	1	1	1	1	1	1	1	1	1	1	1	1	1	1
0.8	0.922273	1.0401	1.01166	0.994608	1.00657	1.06703	1.06088	0.785134	0.900456	0.837246	0.961726	1.1267	1.09495	0.873345
1.6	1.00308	1.04538	0.779987	0.99944	1.02239	1.05701	1.02195	0.791058	0.737633	0.955361	0.920127	0.843865	1.23364	0.83467
2.4	0.992455	1.06062	0.743267	0.852318	1.02161	1.06007	1.04209	0.953396	0.93029	0.96734	0.872828	0.788533	0.962361	1.18395
3.2	0.920727	0.898382	0.743889	0.924206	1.02774	0.912483	0.903603	1.10605	0.771325	0.865858	0.707105	0.857275	0.838323	1.1327
4	0.977038	0.791067	0.708969	0.810621	1.01563	1.00417	0.9678	1.14762	0.68129	0.930645	0.844805	0.957827	0.730952	1.00936
4.8	0.870541	0.725845	0.792317	0.866038	1.02828	0.966082	1.02884	1.43567	0.725835	0.984919	0.724916	0.804063	0.867454	0.935383
5.6	0.973926	0.70848	0.732267	0.882484	1.01206	1.01	1.0014	1.11972	0.787743	0.930408	0.659964	0.813409	0.920877	0.904666
6.4	0.924387	0.847813	0.692253	0.803285	1.06762	0.987855	1.02598	1.11664	0.949023	1.03072	0.600515	0.651842	0.928409	0.825089
7.2	0.972342	0.618749	0.680744	0.811613	1.05629	0.994563	0.992976	1.18887	1.18134	0.749804	0.872907	0.782768	0.981115	0.771263
8	0.927457	0.765365	0.84094	0.796214	1.08427	1.11475	1.00378	1.0947	1.37496	0.816618	0.833248	0.911408	0.751524	0.789598
8.8	1.02305	0.650916	0.729873	0.807306	1.06177	1.0199	1.05667	0.863915	1.40948	0.554029	0.76034	0.986818	0.952701	0.866915
9.6	0.909632	0.823544	0.686506	0.848044	0.971457	1.03734	1.02458	0.787893	1.22634	0.563171	0.936315	0.891893	0.754854	0.765724
10.4	0.993801	0.832289	0.68149	0.903127	1.07178	0.951455	1.05778	0.756168	1.39634	1.11627	0.864833	0.864882	0.764429	0.679049
11.2	1.03253	0.785934	0.786932	0.890789	1.08785	0.997014	1.0677	0.750696	1.1271	1.6578	0.870216	0.999723	1.06516	0.746817
12	0.995932	0.771282	0.74733	0.855362	0.96411	0.933985	1.17547	0.780448	1.0791	1.61738	0.738215	0.936677	0.996028	0.723421
12.8	0.987443	0.828064	0.690315	0.745995	0.801533	0.942613	1.08691	0.614043	0.973563	1.70297	0.632812	0.821412	1.12127	0.698466
13.6	0.952925	0.847738	0.718451	0.842544	1.00246	0.833853	0.988721	0.628299	1.02811	1.36553	0.641362	0.652804	1.32281	0.746212
14.4	1.01722	0.812094	0.753322	0.804101	0.855326	0.752587	1.15606	0.816117	0.891912	1.36082	0.788205	0.678356	1.31293	0.769894
15.2	0.997454	0.821525	0.773571	0.839628	0.990085	0.92624	1.0285	0.71082	1.08982	1.51005	0.643895	0.64748	1.43713	0.661637
16	1.00242	0.849034	0.784057	0.820213	0.837362	0.806503	1.03169	0.799382	0.984544	1.65069	0.633604	0.766057	0.914535	0.801566
16.8	1.07596	0.887648	0.840516	0.938151	1.07471	0.879577	1.15299	0.672322	0.819398	1.60215	0.639501	0.57271	1.06516	0.770913
17.6	1.04581	0.83159	0.701627	0.921331	1.13554	0.870571	1.18766	0.425263	0.965207	1.54807	0.667168	0.49589	0.984119	0.782404
18.4	1.02972	0.863727	0.798829	0.936893	0.966283	1.01946	1.10048	0.447118	0.750933	1.56295	0.772887	0.516014	0.896272	0.875668
19.2	1.02592	0.803177	0.816475	0.904867	1.06289	0.957775	1.06576	0.450416	0.819702	1.61961	0.621136	0.658798	1.13633	0.779794
20	1.01059	0.857922	0.815794	1.04921	1.06758	0.953615	1.01308	0.468545	0.805941	1.47661	0.668949	0.772716	1.08706	0.666221
20.8	0.996643	0.862909	0.776722	0.802576	1.02347	1.04751	1.15269	0.493186	0.829676	1.39515	0.65193	0.931679	1.05671	0.60501
21.6	1.00599	0.743259	0.677672	0.717583	1.15149	1.0389	1.01202	0.511158	0.810982	1.38276	0.613062	0.921753	1.24551	0.578686
22.4	0.963291	0.856458	0.834422	0.763103	1.11432	1.07383	1.11002	0.461341	0.833553	1.37179	0.61033	0.959702	1.11984	0.661128
23.2	0.993302	0.859457	0.743497	0.811504	1.23758	1.07225	1.05667	0.409137	0.698022	1.47909	0.594182	1.14985	0.839669	0.727305
24	1.09538	0.848528	0.669196	0.808957	1.16312	1.11483	1.09544	0.415333	0.902532	1.24024	0.527924	1.07235	0.460965	0.6716
24.8	1.01707	0.824613	0.765088	0.816685	1.16902	1.08165	1.0925	0.553154	0.841433	1.10125	0.533592	0.732522	0.479042	0.721511
25.6	1.04832	0.849701	0.746724	0.814906	1.14073	1.0085	0.957552	0.605855	0.787337	1.23203	0.500059	0.884137	0.479042	0.668481
26.4	0.968562	0.755785	0.774966	0.803796	1.17141	1.0604	1.1612	0.563833	0.73173	1.15911	0.522352	0.729522	0.403687	0.76703
27.2	0.997951	0.760386	0.765274	0.739365	1.14829	1.09197	1.01049	0.506925	0.70241	0.951254	0.619763	0.737614	0.429486	0.829399
28	0.952556	0.745723	0.786555	0.801663	1.04313	1.0588	1.10592	0.624853	0.578904	1.06736	0.657194	0.865945	0.431138	0.703432
28.8	0.980838	0.783605	0.822483	0.729435	1.09004	1.08754	1.14796	0.717762	0.689982	0.973398	0.620265	1.28185	0.339965	0.658156
29.6	0.989592	0.914223	0.772256	0.733733	1.06084	1.07004	1.13839	0.665026	0.539218	1.17957	0.613576	1.15513	0.423768	0.723838
30.4	1.0169	0.928799	0.774793	0.78767	1.14232	1.12543	0.942985	0.751533	0.418756	1.066	0.657431	1.29262	0.400212	0.637502
31.2	1.01159	0.893661	0.783925	0.742746	1.17481	1.0795	1.05992	0.696884	0.405554	1.15734	0.62359	0.864649	0.402395	0.643198
32	0.934426	0.894122	0.598476	0.784259	1.09765	1.06502	1.04834	0.750582	0.59538	1.18978	0.508925	0.95661	0.311666	0.623736
32.8	1.02392	0.791766	0.729906	0.785269	1.14385	1.1271	1.02702	0.77995	0.39974	0.987073	0.544627	0.990282	0.50603	0.625477
33.6	0.911346	0.906912	0.61132	0.797372	1.08776	1.04877	1.23324	0.559862	0.587241	1.09627	0.625925	0.747419	0.350069	0.657849
34.4	1.06238	0.997824	0.760876	0.821698	1.09109	1.05572	0.972218	0.634407	0.459453	0.925923	0.593667	0.752824	0.383234	0.713012
35.2	0.979634	0.941439	0.803493	0.771922	1.16046	1.09899	1.06499	0.581975	0.577959	0.923111	0.668474	0.669115	0.436595	0.656481
36	1.03543	0.906798	0.767136	0.745995	1.10708	1.13764	1.1418	0.666842	0.651995	0.962761	0.59343	0.649188	1.05893	0.71454
36.8	1.00478	0.909609	0.793379	0.815103	1.17261	1.08048	1.17102	0.676989	0.538561	1.15479	0.566475	0.708449	0.581309	0.620171
37.6	0.943995	0.922944	0.689039	0.716944	1.14578	1.07957	1.30163	0.592287	0.590119	1.04397	0.540352	0.645771	0.42808	0.567545
38.4	0.985809	0.841005	0.728555	0.750838	1.13952	1.12127	1.15523	0.728712	0.635027	1.0778	0.564021	0.662827	0.592814	0.557837
39.2	1.00659	0.90921	0.855438	0.729417	1.10451	1.20011	1.10552	0.67231	0.525912	0.903017	0.618088	0.740303	0.408446	0.508308
40	1.02165	0.920276	0.776517	0.704334	1.18939	1.15288	1.13134	0.632357	0.704524	0.924703	0.684267	0.762689	0.473598	0.548415
40.8	1.02817	0.86901	0.862639	0.750958	1.15326	1.22515	1.13324	0.577842	0.679151	0.975798	0.585395	0.750867	0.422684	0.549474
41.6	0.965815	0.804548	0.943166	0.669651	1.10658	1.19828	1.27205	0.60206	0.653842	0.898001	0.571344	0.635636	0.381278	0.523077
42.4	0.966162	0.900781	0.974096	0.70969	1.17172	1.06383	1.03289	0.713493	0.605188	1.03959	0.544825	0.707361	0.350518	0.6921
43.2	1.03395	0.878962	0.776695	0.75919	1.14572	1.18441	1.18073	0.657434	0.605387	0.940056	0.507105	0.546005	0.386324	0.656585
44	1.09923	0.78448	0.753466	0.723802	1.10257	1.1197	1.05167	0.610041	0.480878	0.877489	0.540906	0.600135	0.37607	0.639659
44.8	1.16341	0.911968	0.899326	0.718726	0.904092	1.07245	0.974084	0.471346	0.579563	0.766091	0.528122	0.749073	0.356496	0.639419
45.6	0.99401	0.852738	1.00006	0.830652	1.09028	1.20029	1.22398	0.633736	0.511813	0.670731	0.532397	0.846321	0.555528	0.552618
46.4	1.03604	0.927859	0.841388	0.774424	0.933168	1.14928	1.13935	0.506537	0.435834	0.621853	0.557768	0.837596	0.320681	0.660682
47.2	1.09469	0.81319	0.880879	0.764645	1.00464	1.19235	1.0786	0.624701	0.577481	0.618579	0.449001	0.807679	0.459409	0.79676
48	1.14837	0.807089	0.85032	0.802124	0.996437	1.0876	1.16211	0.590238	0.571875	0.576396	0.472828	0.78741	0.356407	0.599503
48.8	1.13712	0.780219	0.846744	0.657358	1.03186	1.19655	1.18687	0.627605	0.721005	0.716294	0.476113	0.736357	0.386454	0.569996
49.6	1.08713	0.809565	0.97093	0.702025	1.03119	1.17417	1.12909	0.614744	1.05701	0.709116	0.425015	0.846519	0.388412	0.54972
50.4	1.12534	0.891326	0.963476	0.804852	1.03134	1.16189	1.21572	0.718922	0.982703	0.664012	0.485375	0.681862	0.691447	0.639674
51.2	1.03508	0.854679	0.930021	0.752614	0.876033	1.10397	1.06779	0.700096	0.713607	0.847209	0.484583	0.710864	0.762557	0.57528
52	1.1324	0.74693	0.725987	0.731222	0.94854	1.04096	1.09738	0.623862	0.614094	1.02983	0.489373	0.539623	0.760018	0.559842
52.8	1.04749	0.858423	0.75391	0.738392	0.887363	1.09903	1.07657	0.591429	0.526717	1.02726	0.469503	0.546337	0.915691	0.560383
53.6	1.23877	0.784966	0.80291	0.809185	1.02941	1.22651	1.0581	0.570559	0.774642	0.830928	0.435543	0.539303	0.707157	0.565126
54.4	1.08962	0.810661	0.71036	0.824134	0.871597	1.06422	0.896815	0.582548	0.726267	0.895435	0.492302	0.406405	0.711847	0.560797
55.2	1.08124	0.837451	0.766926	0.907583	1.01411	1.06838	1.09589	0.54279	0.788579	1.18174	0.516406	0.521079	0.894537	0.495671
56	1.07467	0.841649	0.741524	0.876324	0.968384	1.13132	1.02429	0.488567	0.951758	0.940122	0.494162	0.575385	0.842453	0.48975
56.8	1.10476	0.853874	0.714836	0.830604	0.767316	1.01978	1.13567	0.589173	0.787886	0.986907	0.476311	0.563604	0.667641	0.565421
57.6	0.970364	0.778364	0.656787	0.898353	0.938498	1.15667	1.06779	0.483213	0.828942	0.929787	0.45189	0.494144	0.723808	0.542462
58.4	0.963318	0.749362	0.751152	0.813912	1.13484	0.943581	1.14356	0.562547	0.669511	0.817708	0.441678	0.501179	0.749358	0.674433
59.2	1.07161	0.838909	0.786983	0.821861	0.921712	0.953108	1.18376	0.422882	0.607792	1.0465	0.454779	0.440945	0.853293	0.545709
60	1.13543	0.844657	0.781298	0.928273	0.999917	0.888334	1.02303	0.42327	0.804126	1.16234	0.448486	0.421592	0.835538	0.545837
60.8	1.04411	0.748807	0.784127	0.901647	0.896362	0.91792	1.17149	0.489555	0.636143	1.0216	0.400198	0.529473	0.676907	0.614878
61.6	1.15837	0.822145	0.729929	0.86698	1.01772	0.841432	1.17669	0.882	0.774491	0.92668	0.48395	0.393921	0.552741	0.596593
62.4	1.11128	0.746463	0.69206	0.848361	0.947019	0.852453	1.10714	0.792695	0.706716	1.04334	0.424817	0.594161	0.762301	0.531226
63.2	0.997488	0.814426	0.781021	0.892108	0.940258	0.872829	1.15795	0.772535	0.755039	1.07038	0.418722	0.369523	0.755278	0.625
64	1.1124	0.709947	0.700256	0.871549	1.16487	0.862252	1.10342	0.808708	0.865906	1.17405	0.445043	0.446036	0.718563	0.541762
64.8	1.10235	0.733176	0.715596	0.837998	0.929477	1.03152	1.08225	0.758317	0.771486	0.987786	0.423352	0.565913	0.641735	0.464254
65.6	1.09219	0.872951	0.571775	0.86063	0.912998	0.800015	1.17085	0.592032	0.731855	1.24866	0.428148	0.548921	0.569593	0.668258
66.4	1.11352	0.830434	0.740753	1.17072	0.754329	1.0333	1.13004	0.50937	0.824114	1.08283	0.478053	0.620823	0.445425	0.594188
67.2	1.14805	0.858718	0.672082	1.02155	0.941785	1.03576	1.07959	0.534832	0.839575	1.01207	0.474411	0.574429	0.510786	0.625382
68	0.93081	0.860929	0.713408	0.859002	0.99458	0.891869	0.974116	0.46354	0.779115	1.2351	0.533663	0.52107	0.615911	0.582251
68.8	1.09042	0.766154	0.786398	0.960086	0.900919	0.849169	1.0681	0.593681	0.836911	1.30273	0.539244	0.629782	0.643832	0.598167
69.6	1.14082	0.880802	0.720619	0.750923	0.831969	0.862934	1.09686	0.589129	0.847649	1.26212	0.511419	0.541241	0.817876	0.579004
70.4	1.14956	0.870464	0.756505	0.811508	0.80705	0.871314	1.14072	0.567707	0.807563	1.13349	0.459489	0.522827	0.798403	0.672778
71.2	1.13124	0.901726	0.744461	0.822289	0.804182	0.899293	1.13836	0.504777	0.810785	1.00423	0.461666	0.515987	0.627477	0.636204
72	1.04193	0.865515	0.821019	0.78716	0.99107	1.00984	1.20451	0.531164	0.869591	1.30203	0.450465	0.591709	0.65414	0.65056
72.8	1.09355	0.738316	0.74818	0.913432	0.766836	0.999878	1.09739	0.490742	0.856689	1.11264	0.469489	0.600862	0.833116	0.569423
73.6	1.08377	0.742691	0.707923	0.835009	0.863432	0.806519	1.2101	0.553795	0.714301	1.12239	0.475797	0.514706	0.594012	0.713522
74.4	1.06705	0.82809	0.755437	0.704703	0.807521	0.664838	1.26264	0.435745	0.775839	1.09561	0.57715	0.367926	0.53154	0.623886
75.2	1.17329	0.81752	0.800761	0.79114	0.911048	0.595359	1.11321	0.517268	0.88671	1.2111	0.498814	0.328402	0.592329	0.649191
76	1.12456	0.887309	0.81454	0.797182	0.747403	0.689005	1.23118	0.539005	0.848853	1.11356	0.400924	0.363827	0.89276	0.557232
76.8	1.08845	0.922448	0.796183	0.809944	0.861305	0.703584	1.1581	0.500831	0.756271	1.13445	0.387572	0.496153	0.678957	0.621817
77.6	1.1807	0.862195	0.774794	0.772094	0.858577	0.794353	1.08526	0.364401	0.546775	0.878221	0.530521	0.327524	0.559492	0.619684
78.4	1.03799	0.875198	0.781177	0.849568	0.913587	0.990865	1.27424	0.419611	0.720459	1.22961	0.416964	0.416727	0.602325	0.634454
79.2	1.20565	0.890553	0.682532	0.811166	0.738176	0.78908	1.22384	0.382852	0.668728	0.878541	0.422437	0.427976	0.424605	0.587799
80	1.15026	1.06541	0.660552	0.834975	0.634327	0.940925	1.16346	0.443249	0.759232	0.770357	0.474617	0.371551	0.479042	0.599694
80.8	1.23427	0.933499	0.82716	0.714538	0.606483	0.800766	1.23471	0.452809	0.774705	0.617236	0.427515	0.478653	0.645009	0.556606
81.6	1.18869	0.907586	0.879807	0.790812	0.714416	1.20953	1.23922	0.362948	0.800572	0.4939	0.4085	0.598506	0.513259	0.534282
82.4	1.19357	0.930883	0.813022	0.902831	0.768863	0.978457	1.22701	0.412455	0.541819	0.535166	0.450839	0.495413	0.512367	0.552179
83.2	1.17681	0.890572	0.835282	0.860238	0.70255	1.09085	1.15274	0.425639	0.441668	0.69272	0.478116	0.406862	0.542074	0.707569
84	1.17406	0.792288	0.805822	0.769876	0.708158	0.931774	1.16263	0.467913	0.530086	0.636953	0.49672	0.395556	0.834902	0.597776
84.8	1.16368	0.815499	0.771376	0.821017	0.739018	1.03292	1.12336	0.45877	0.557545	0.589631	0.494	0.399331	0.76793	0.500516
85.6	1.18003	1.0422	0.687926	0.889822	0.785079	0.964563	1.21557	0.507068	0.665025	0.475035	0.531585	0.314796	0.60299	0.498711
86.4	1.25093	1.04927	0.765176	0.924251	0.952786	1.25104	1.28395	0.53163	0.701624	0.597692	0.491497	0.410795	0.687321	0.454356
87.2	1.2975	0.766124	0.621894	0.800548	0.874457	1.19541	1.33526	0.508379	0.659314	0.642577	0.43427	0.351839	0.546966	0.51054
88	1.14929	1.01157	0.752699	0.893781	0.972241	1.15441	1.33302	0.457461	0.60995	0.553141	0.41804	0.312907	0.490448	0.492973
88.8	1.2335	0.978198	0.662916	0.761069	0.931454	0.947356	1.22672	0.464307	0.701833	0.477081	0.403287	0.396531	0.59696	0.499363
89.6	1.25209	1.02482	0.637232	0.772006	0.806933	1.0161	1.20286	0.630959	0.560546	0.495828	0.382334	0.451458	0.682635	0.475003
90.4	1.31311	1.05567	0.669545	0.893787	0.720851	1.09371	1.09339	0.4269	0.493018	0.645825	0.388203	0.375025	0.652234	0.408854
91.2	1.29415	0.879902	0.67618	0.838603	0.609139	1.00453	1.20455	0.461944	0.589641	0.570768	0.44702	0.449324	0.648327	0.407518
92	1.24288	0.9743	0.77343	0.844003	0.691475	0.986901	1.24919	0.447882	0.662042	0.481171	0.41013	0.550163	0.532269	0.403198
92.8	1.11556	1.11624	0.719324	0.825146	0.599513	0.945563	1.1556	0.396185	0.841867	0.622427	0.434812	0.60293	0.702107	0.39357
93.6	1.13044	0.787915	0.697765	0.754788	0.717844	1.04267	1.2512	0.432834	0.577349	0.784659	0.441328	0.601009	0.643189	0.443659
94.4	1.10528	0.822845	0.611215	0.771271	0.644694	0.908869	1.32511	0.344823	0.606706	0.761189	0.500063	0.571999	0.833752	0.433601
95.2	1.11058	0.809631	0.807657	0.883164	0.66264	1.10816	1.2644	0.356646	0.777978	0.645047	0.531917	0.38485	0.879435	0.435099
96	1.1385	1.00162	0.852526	0.846756	0.770021	0.799741	1.07423	0.442972	0.744136	0.760104	0.545537	0.324778	0.739391	0.419627
96.8	1.1816	0.98421	0.9212	0.850181	0.725952	0.817112	1.2149	0.390967	0.667764	0.676086	0.559351	0.278824	0.971031	0.384969
97.6	1.22532	1.03972	0.830525	0.893567	0.795407	0.882318	1.23671	0.433474	0.594744	0.608835	0.534793	0.305516	0.678957	0.426127
98.4	1.07653	0.89828	0.755643	0.839007	0.646706	0.96941	1.19323	0.378962	0.464594	0.528195	0.516274	0.282906	0.592403	0.406767
99.2	1.16652	0.963024	0.857238	0.855945	0.534179	1.01088	1.14777	0.445396	0.646113	0.462635	0.523151	0.302396	0.612545	0.420436
100	1.24468	0.989765	0.867811	0.801421	0.540998	0.950675	1.16344	0.431225	0.655251	0.49892	0.485553	0.272455	0.638723	0.387223
100.8	1.09542	0.802681	0.842096	0.772049	0.527173	0.959924	1.30718	0.430591	0.687768	0.625207	0.572339	0.376152	0.563795	0.412948
101.6	1.22577	0.937607	0.89279	0.782345	0.479424	1.09999	1.08882	0.411453	0.713783	0.535274	0.663869	0.317244	0.44638	0.398316
102.4	1.14833	1.08417	0.860255	0.855125	0.740401	0.981593	1.16798	0.455986	0.501259	0.487982	0.721052	0.258374	0.497902	0.367143
103.2	1.13496	0.944204	0.838211	0.835322	0.428393	1.10682	1.19367	0.478944	0.498773	0.479667	0.657749	0.373273	0.528174	0.332389
104	1.12354	1.0077	0.796372	0.739666	0.438344	1.01343	1.25667	0.555582	0.483986	0.506119	0.536129	0.320096	0.614045	0.404036
104.8	1.15417	0.945568	0.817717	0.891514	0.495315	1.10146	1.24558	0.449432	0.635322	0.435497	0.637053	0.344676	0.551078	0.36892
105.6	1.18504	1.0588	0.843496	0.928918	0.464325	1.03763	1.19452	0.406564	0.629557	0.442486	0.677314	0.317421	0.853293	0.418513
106.4	1.12066	0.839795	0.74937	0.944975	0.522085	1.0116	1.17887	0.495311	0.685203	0.513813	0.573885	0.387119	0.859709	0.426682
107.2	1.15562	1.04935	0.867089	0.927335	0.554811	0.919416	1.11743	0.307334	0.84669	0.475298	0.637356	0.318839	0.587438	0.40632
108	0.998199	0.934407	0.897588	0.820467	0.624574	0.944491	1.04703	0.491075	0.903537	0.50186	0.619983	0.283504	0.570288	0.457618
108.8	1.17748	0.946595	0.821614	0.91658	0.589603	1.03369	1.11596	0.328736	0.639195	0.460274	0.613571	0.256193	0.748256	0.406733
109.6	1.06299	0.978321	0.884279	0.97693	0.465217	0.81672	1.10832	0.426213	0.747543	0.467682	0.584018	0.274917	0.672417	0.420348
110.4	1.125	1.06364	0.965572	0.954613	0.779801	0.833087	1.16328	0.282251	0.911382	0.607372	0.569793	0.253273	0.41723	0.436195
111.2	1.08293	0.899844	0.798116	0.983677	0.551995	0.811486	1.17345	0.478545	0.827674	0.536405	0.582321	0.346496	0.513259	0.417546
112	1.10767	0.97445	0.713539	1.01184	0.688416	0.775604	1.16483	0.508646	0.908383	0.559487	0.574259	0.332771	0.467358	0.453848
112.8	1.17128	1.15316	0.824411	0.900759	0.65173	0.866513	1.06503	0.434789	0.991053	0.470655	0.627278	0.498272	0.544154	0.498737
113.6	1.09973	0.821924	0.835918	1.0058	0.705354	0.777524	1.31068	0.442336	0.932831	0.541902	0.568582	0.410632	0.518962	0.498046
114.4	1.10003	0.856955	0.844667	0.966501	0.802574	0.805273	1.16727	0.399852	0.907127	0.369553	0.477894	0.548365	0.634731	0.500831
115.2	1.07805	1.06883	0.77433	0.923593	0.643175	1.07244	1.22422	0.510169	1.10327	0.358685	0.544815	0.340006	0.579681	0.396569
116	1.18285	0.868673	0.82374	0.889039	0.611119	1.05769	1.19597	0.573017	1.14299	0.418404	0.501641	0.234988	0.481963	0.522975
116.8	1.22899	0.909704	0.811807	0.846093	0.499161	1.03696	1.26717	0.399088	0.945181	0.499791	0.448536	0.24658	0.57485	0.461565
117.6	1.37808	0.887742	0.902483	0.827371	0.404684	0.998731	1.15515	0.446999	0.99212	0.352926	0.415958	0.268182	0.599664	0.464594
118.4	1.14592	0.851305	0.872855	0.933255	0.520377	1.04877	1.29908	0.543686	1.06075	0.364968	0.429437	0.285603	0.545478	0.421667
119.2	1.19456	0.92994	0.836037	0.966734	0.709921	1.11755	1.30554	0.423492	1.11551	0.593528	0.446354	0.263275	0.485144	0.433865
120	1.15183	0.807723	0.722401	1.03461	0.682147	1.06811	1.35254	0.434536	1.18254	0.529019	0.390279	0.195772	0.542691	0.467381
120.8	1.28166	1.11569	0.829444	0.951353	0.690649	0.845779	1.19298	0.470791	1.00865	0.657162	0.363954	0.305609	0.656325	0.390593
121.6	1.32623	1.17575	0.743356	0.942364	0.675026	0.869709	1.04078	0.546408	0.988773	0.454859	0.458526	0.228613	0.512463	0.353602
122.4	1.28674	1.06649	0.846611	0.924033	0.747444	0.92348	1.08792	0.440078	1.1148	0.467241	0.408958	0.184894	0.676993	0.372186
123.2	1.15108	0.876047	0.899392	0.969961	0.632376	0.951741	1.13856	0.586975	0.78442	0.364881	0.651832	0.208402	0.581191	0.308429
124	1.2089	0.955781	0.862591	0.887636	0.756221	1.14317	1.20272	0.488877	0.882517	0.49002	0.544919	0.328759	0.476103	0.334692
124.8	1.13484	0.923713	0.897929	0.925759	0.832359	1.18184	1.19721	0.394525	0.950131	0.396784	0.506603	0.300865	0.479042	0.330589
125.6	1.23308	1.08579	0.878599	0.949758	0.775273	1.05309	1.30137	0.442254	0.75146	0.361665	0.554973	0.346777	0.341756	0.332921
126.4	1.16784	1.09615	0.847942	0.965455	0.627829	1.08946	1.28575	0.369777	0.917647	0.400895	0.562344	0.387526	0.353122	0.421218
127.2	0.971744	0.989896	0.813292	0.875989	0.672277	1.05225	1.20664	0.436455	1.10846	0.510599	0.558866	0.483124	0.328981	0.376203
128	0.832247	1.02886	0.819372	0.9025	0.816902	0.846642	1.31042	0.428933	0.889628	0.459861	0.565707	0.399783	0.332993	0.324702
128.8	0.95985	1.23603	0.754349	0.935057	0.922121	1.01321	1.34585	0.423815	1.0787	0.500274	0.533815	0.433003	0.257263	0.415997
129.6	0.61924	0.986224	0.830233	0.961708	0.887149	0.91951	1.19676	0.464112	1.22794	0.606026	0.601575	0.517006	0.299055	0.40116
130.4	0.291559	0.864295	0.831102	0.946238	0.936494	0.772955	1.27237	0.427662	0.92791	0.531815	0.691868	0.414435	0.260532	0.46451
131.2	0.871638	1.09174	0.833244	0.938253	1.06557	0.768814	1.29596	0.39805	1.5284	0.593371	0.553906	0.402637	0.407958	0.487628
132	1.29671	1.00382	0.790848	0.852897	0.862005	0.549059	1.29515	0.530726	1.37408	0.612861	0.558214	0.420815	0.485387	0.417525
132.8	1.38602	1.1153	0.830081	0.939381	1.03014	0.595894	1.29206	0.464218	0.5215	0.604322	0.509721	0.436091	0.339861	0.423489
133.6	1.42135	1.11365	0.820016	0.904995	0.77636	0.745504	1.31519	0.33268	0.60827	0.662641	0.574343	0.475229	0.324512	0.30586
134.4	1.29435	1.00021	0.76632	0.90036	0.729124	0.678953	1.35271	0.358244	0.888252	0.662577	0.56858	0.500253	0.323591	0.491589
135.2	1.34065	1.12521	0.780706	0.989401	0.59964	0.844285	1.28731	0.368237	0.772367	0.58545	0.609727	0.581912	0.312419	0.613627
136	1.38464	1.34064	0.86494	0.960113	0.79234	0.985258	1.20219	0.357975	0.775656	0.436509	0.639094	0.412348	0.335329	0.550663
136.8	1.24469	1.1964	0.862664	0.909345	0.670004	0.846694	1.36811	0.43477	0.716968	0.54334	0.59583	0.490721	0.2953	0.46293
137.6	1.22962	1.16257	0.752514	0.909577	0.72365	1.05967	1.40933	0.502298	0.63828	0.463749	0.652848	0.576921	0.269461	0.3816
138.4	1.31774	0.685461	0.865904	0.830553	0.709031	0.956882	1.25946	0.367844	0.77415	0.44304	0.736107	0.36796	0.323075	0.304455
139.2	1.20727	0.676111	0.824396	0.857076	0.736986	0.942893	1.2571	0.267045	0.929113	0.59046	0.548741	0.403244	0.346541	0.352122
140	1.25873	0.925971	0.814478	0.883418	0.704454	0.735516	1.16675	0.295653	0.735507	0.661894	0.498297	0.476718	0.364644	0.351312
140.8	1.1945	0.849627	0.776929	0.818059	0.681005	0.679836	1.29612	0.340428	0.898921	0.627413	0.476914	0.565421	0.241128	0.341762
141.6	1.31068	1.06522	0.653216	0.899482	0.600206	0.776411	1.31674	0.337953	0.808572	0.581136	0.561221	0.553546	0.263136	0.348175
142.4	1.29955	0.896278	0.665488	0.808285	0.628803	0.802861	1.14674	0.480213	0.682685	0.595074	0.442905	0.445258	0.154627	0.403178
143.2	1.28481	0.968943	0.756771	0.813271	0.597687	0.922449	1.28885	0.512328	0.834588	0.644682	0.413466	0.645109	0.293958	0.399871
144	1.18412	0.827448	0.662509	0.86607	0.554664	0.748698	1.20675	0.722163	0.712798	0.455335	0.420451	0.616175	0.250408	0.375524
144.8	1.28681	0.686905	0.79325	0.869651	0.724252	0.896892	1.15331	0.928361	0.643891	0.609137	0.527793	0.479872	0.285231	0.373812
145.6	1.07754	0.894678	0.737963	0.881128	0.699541	0.836903	1.26887	1.21637	0.615803	0.672121	0.517889	0.485356	0.21712	0.36593
146.4	0.945912	0.74034	0.752941	0.818764	0.664944	0.790078	1.20187	1.14936	0.612894	0.703291	0.473057	0.480752	0.256232	0.318552
147.2	1.19653	0.72173	0.799044	0.864516	0.837022	0.980056	1.24522	1.06356	0.62475	0.735222	0.446081	0.425174	0.435093	0.332586
148	1.08017	0.758776	0.700115	0.9227	0.623352	0.964314	1.31638	0.967267	0.571932	0.751562	0.474688	0.361813	0.388024	0.302508
148.8	1.08481	0.846635	0.746238	0.865808	0.589764	0.845511	1.42031	0.95371	0.678721	0.579259	0.432658	0.412479	0.279441	0.310781
149.6	1.19109	0.637291	0.796903	0.820948	0.724389	0.848544	1.56799	1.00598	0.652571	0.798927	0.405921	0.405719	0.300059	0.308879
150.4	1.17725	0.63146	0.672992	0.85513	0.649725	0.862858	1.2533	0.848709	0.707371	0.647329	0.425381	0.519126	0.315852	0.302101
151.2	1.16851	0.798846	0.605941	0.864307	0.630511	0.909193	1.22825	0.783417	0.611357	0.637196	0.438291	0.371444	0.254681	0.338623
152	1.05908	0.737599	0.717468	0.875575	0.538538	0.909982	1.10704	0.747818	0.553996	0.533781	0.384208	0.323688	0.279441	0.347066
152.8	1.16344	0.811951	0.74843	0.854659	0.648356	0.807628	0.885499	0.872385	0.728392	0.605971	0.458032	0.466611	0.254681	0.286367
153.6	1.20506	0.968065	0.818525	0.949673	0.693135	0.818443	0.862072	0.648059	0.494509	0.556687	0.404328	0.337096	0.316431	0.280572
154.4	1.22696	0.889912	0.804807	0.93161	0.569414	0.680373	1.36972	0.569851	0.605345	0.676013	0.320773	0.33973	0.24778	0.298313
155.2	1.17317	0.911118	0.730637	0.866987	0.807548	0.761172	1.24567	0.56363	0.61212	0.593419	0.410919	0.361357	0.311377	0.294881
156	1.19894	0.867073	0.776688	0.870734	0.695769	1.30738	1.18043	0.589897	0.612102	0.569444	0.455322	0.423001	0.446005	0.320869
156.8	1.29891	0.992576	0.769186	0.883898	0.645502	1.16215	1.03682	0.624202	0.877636	0.541807	0.430668	0.465358	0.459409	0.322995
157.6	1.20112	0.746158	0.736332	0.86993	0.6468	1.29105	1.01492	0.598457	0.467001	0.625001	0.482051	0.513104	0.505868	0.350096
158.4	1.33384	0.961848	0.763493	0.871324	0.776299	1.13128	0.857337	0.643179	0.371262	0.663527	0.423193	0.519018	0.505868	0.278817
159.2	1.44891	0.944312	0.801523	0.798719	0.885592	1.1179	1.16306	0.482132		0.516224	0.460816	0.340843	0.326619	0.297946
160		0.858417	0.825709	0.868634	0.759602	1.23511	1.2164	0.562889		0.677829	0.543776	0.367268	0.268815	0.299348
160.8		0.912275	0.783704	0.90975	0.824104	1.10249	1.11112	0.437288		0.759609	0.541644	0.425059	0.248137	0.283408
161.6		0.922423	0.761881	0.911443	1.00996	1.21509	1.26785	0.476447		0.71396	0.548861	0.359375	0.298071	0.353167
162.4		1.01111	0.690027	0.843248	0.850062	1.29702	1.31943	0.729539		0.683517	0.746804	0.369398	0.461167	0.386924
163.2		0.953796	0.80489	0.965897	0.720305	1.29719	1.23586	0.516303		0.562625	0.714315	0.451989	0.382544	0.406613
164		0.966868	0.804169	0.851156	0.854965	1.21599	1.24156	0.572118		0.738807	0.668353	0.489958	0.390077	0.424974
164.8		1.06443	0.794504	0.849419	0.674976	1.29766	1.42196	0.469156		0.988852	0.904244	0.45565	0.359281	0.537294
165.6		1.02954	0.738544	0.914847	0.76369	1.13872	1.4011	0.622657		0.647558	0.829413	0.364786	0.391943	0.435057
166.4		1.07461	0.740359	0.980454	0.74347	1.14561	1.0978	0.448285		0.643325	0.78132	0.381461	0.402761	0.410242
167.2		1.00941	0.662888	0.979528	0.806353	1.20813	1.20786	0.548519		0.869156	0.634678	0.456478	0.422156	0.350401
168		1.06916	0.733642	0.984076	0.687655	1.11648	1.34387	0.504335		0.830974	0.744148	0.482201	0.328754	0.385513
168.8		1.23167	0.724951	0.847852	0.702604	1.08411	1.15836	0.493556		0.818054	0.550925	0.55852	0.366515	0.43453
169.6		1.09017	0.686317	0.872207	0.764413	1.02968	1.25394	0.580821		0.7531	0.580785	0.449253	0.412117	0.407277
170.4		0.909329	0.635091	0.895966	0.668694	1.36132	1.29549	0.485169		0.708728	0.578184	0.484578	0.325748	0.413776
171.2		0.760678	0.630792	0.942117	0.562742	1.12712	1.13304	0.475371		0.760002	0.603065	0.423502	0.334969	0.477602
172		0.764051	0.736957	0.907726	0.513703	1.1387	1.33967	0.550399		0.724374	0.659005	0.336188	0.330007	0.381684
172.8		0.754519	0.730129	0.91826	0.686779	1.10171	1.28125	0.50285		0.775271	0.727866	0.325706	0.410607	0.334036
173.6		0.931898	0.722383	0.806814	0.561649	1.13349	1.19094	0.52925		0.686293	0.700102	0.491976	0.462967	0.362921
174.4		0.679161	0.800264	0.917829	0.504933	1.11785	1.45148	0.459941		0.42584	0.563249	0.476274	0.266134	0.406423
175.2		0.62894	0.826034	0.926993	0.603112	1.26289	1.39873	0.496015		0.577469	0.614299	0.437021	0.343056	0.51515
176		0.564184	0.743159	0.910786	0.699437	1.14701	1.23149	0.431155		0.685251	0.608842	0.45037	0.527291	0.394894
176.8		0.662685	0.765144	0.974365	0.615563	1.09621	1.27929	0.3401		0.673248	0.593617	0.3534	0.482194	0.370528
177.6		0.965542	0.786992	0.958676	0.614927	1.01618	1.16609	0.377737		0.601317	0.749657	0.450131	0.392883	0.358639
178.4		0.837795	0.6385	0.974259	0.531024	1.24636	1.33673	0.358379		0.598831	0.72642	0.527239	0.27716	0.394518
179.2		0.638179	0.688581	0.991282	0.555364	1.21102	1.26524	0.390228		0.996797	0.758704	0.428689	0.336349	0.335657
180		0.615205	0.781389	0.90383	0.598462	1.3429	1.43268	0.370663		0.690328	0.742778	0.609067	0.328834	0.419022
180.8		0.666338	0.716699	0.916259	0.500857	1.36399	1.38187	0.339582		0.706521	0.555661	0.495043	0.319361	0.383624
181.6		0.684856	0.58416	0.895539	0.488438	1.19731	1.43321	0.37938		0.937665	0.532076	0.446623	0.310171	0.428556
182.4		0.725467	0.629852	0.867399	0.610155	1.2956	1.32671	0.339285		0.912829	0.638503	0.460111	0.423339	0.363864
183.2		0.61141	0.661049	0.858971	0.474292	1.23572	1.35284	0.270384		1.03899	0.458035	0.453537	0.432306	0.418525
184		0.613741	0.729848	0.816042	0.475539	1.30155	1.43809	0.349145		0.792158	0.477597	0.390961	0.320787	0.504459
184.8		0.829221	0.694252	0.858909	0.752762	1.26393	1.29161	0.291027		0.986539	0.352336	0.467745	0.297783	0.464231
185.6		0.698456	0.78011	0.718796	0.574003	1.0696	1.37439	0.317917		0.823584	0.394615	0.317755	0.202262	0.577814
186.4		0.878753	0.787936	0.825902	0.781467	1.35911	1.38346	0.292143		0.859681	0.423214	0.467407	0.34645	0.468572
187.2		0.768777	0.671035	0.786122	0.679233	1.19128	1.34329	0.290007		0.959621	0.402912	0.48687	0.308804	0.410081
188		0.616719	0.61761	0.870529	0.638756	1.03889	1.41844	0.30752		0.780178	0.38192	0.379014	0.36917	0.44839
188.8		0.603237	0.77013	0.842782	0.69473	1.338	1.32955	0.273168		0.689411	0.438558	0.504045	0.303247	0.3504
189.6		0.649058	0.772201	0.876593	0.847252	1.36954	1.26167	0.282087		0.675659	0.453867	0.480974	0.422684	0.411721
190.4		0.714548	0.794644	0.846034	0.830623	1.38647	1.24838	0.325432		0.66175	0.491663	0.386109	0.316431	0.385685
191.2		0.525174	0.804461	0.768293	0.649058	1.01883	1.24028	0.315832		0.556343	0.401502	0.463213	0.519811	0.423366
192		0.657738	0.748479	0.757459	0.66169	1.06036	1.36439	0.41077		0.740744	0.37999	0.389114	0.40646	0.460575
192.8		0.572649	0.796316	0.718606	0.709632	1.18265	1.26741	0.288081		0.888744	0.323863	0.427341	0.426869	0.436882
193.6		0.724695	0.833088	0.812225	0.597617	1.31291	1.21067	0.303996		0.848764	0.336617	0.350249	0.425272	0.457815
194.4		0.82863	0.865358	0.93727	0.630341	1.4021	1.25523	0.355181		0.636397	0.368087	0.321945	0.450009	0.650913
195.2		0.788126	0.881328	0.916925	0.601355	1.32136	1.18815	0.257507		1.00621	0.364635	0.351731	0.352749	0.603862
196		0.806944	0.783931	0.839184	0.688902	1.38183	1.27251	0.303469		1.04418	0.356045	0.419061	0.420291	0.649733
196.8		0.720919	0.873499	0.954064	0.572449	1.37302	1.39757	0.254636		0.850492	0.37714	0.369204	0.319361	0.494705
197.6		0.812603	0.731995	0.900395	0.670142	1.28831	1.31778	0.259613		0.864732	0.335142	0.387093	0.427254	0.426777
198.4		0.939948	0.929834	0.85226	0.730222	1.39836	1.23648	0.262432		0.953755	0.300423	0.381499	0.44638	0.492838
199.2		1.00012	0.844103	0.862344	0.584337	1.41219	1.47801	0.264987		0.919591	0.319721	0.457786	0.29769	0.474566
200		0.848065	0.923955	0.893757	0.547613	1.40485	1.49224	0.457369		0.972077	0.329275	0.382537	0.311377	0.453368
200.8		0.806614	0.840919	0.783352	0.603542	1.35845	1.32928	0.354559		0.828467	0.3104	0.302344	0.3731	0.442011
201.6		0.78324	0.904457	0.751559	0.583316	1.27251	1.2685	0.275987		1.06216	0.308986	0.334368	0.287425	0.478423
202.4		0.810328	0.798514	0.923427	0.826995	1.36826	1.40381	0.287693		1.06857	0.367515	0.291984	0.349571	0.590967
203.2		0.603652	0.801126	0.880794	0.823861	1.35888	1.08822	0.337393		0.886065	0.341144	0.40091	0.352978	0.501903
204		0.832453	0.643449	0.894694	0.617305	1.37004	1.26536	0.304578		1.05942	0.330912	0.377016	0.262332	0.44559
204.8		0.641288	0.949657	0.765798	0.565167	1.31802	0.82127	0.275691		0.845552	0.31933	0.389783	0.277764	0.474758
205.6		0.971839	0.668441	0.885839	0.790617	1.43553	1.02833	0.303462		1.00481	0.307077	0.306885	0.356312	0.427255
206.4		0.973702	0.7993	0.846974	0.865136	1.31931	1.00382	0.330858		0.880289	0.306215	0.312846	0.426266	0.38537
207.2		0.895	0.804809	0.920188	0.646411	1.3893	1.22268	0.370642		0.908007	0.308965	0.283296	0.619249	0.415924
208		1.03925	0.85563	0.770044	0.511232	1.35826	1.12169	0.452616		0.765173	0.319547	0.403468	0.651006	0.366965
208.8		0.831902	0.818454	0.976078	0.62431	1.35247	1.37237	0.259157		0.831805	0.320774	0.32065	0.463954	0.390414
209.6		0.974258	0.76378	0.985825	0.543448	1.35395	1.28113	0.275987		1.2242	0.359442	0.284839	0.289421	0.385334
210.4		0.903633	0.768342	0.955853	0.584202	1.29623	1.38691	0.392936		0.948081	0.404088	0.305663	0.319361	0.458611
211.2		0.847569	0.758137	0.904072	0.721731	1.2745	1.31898	0.308733		1.03966	0.46913	0.372024	0.312419	0.444844
212		0.85502	0.747214	0.948324	0.655749	1.40306	1.24677	0.384409		1.00773	0.538447	0.283543	0.274261	0.476308
212.8		1.26315	0.743196	0.960009	0.58089	1.26839	1.36809	0.418743		1.0115	0.471538	0.392597	0.265687	0.529142
213.6		0.836447	0.616448	0.982553	0.61994	1.38224	1.3783	0.413412		1.05015	0.413041	0.288502	0.319361	0.495131
214.4		1.11869	0.638525	0.939785	0.529296	1.42136	1.28295	0.398759		1.13991	0.391004	0.24935	0.474647	0.479222
215.2		1.13376	0.645534	0.914493	0.680517	1.45606	1.40121	0.31852		0.908127	0.462932	0.264897	0.458214	0.441156
216		0.81983	0.682455	0.70389	0.611075	1.18285	1.01816	0.40385		1.07145	0.487877	0.306887	0.385316	0.447063
216.8		0.878892	0.78336	0.807243	0.648082	1.3856	1.1225	0.513439		1.1552	0.43348	0.256812	0.239521	0.440798
217.6		0.755596	0.653257	0.797567	0.634338	1.30946	1.34807	0.402789		1.41318	0.440023	0.245022	0.273318	0.423673
218.4		0.698009	0.750871	0.712988	0.671163	1.40965	1.33671	0.432903		1.22806	0.379516	0.297168	0.330151	0.488613
219.2		0.886078	0.726784	0.895152	0.702158	1.286	1.44048	0.310399		0.976025	0.341938	0.252029	0.448383	0.552994
220		0.59205	0.692476	1.06379	0.701986	1.31727	1.26352	0.324663		1.03186	0.362387	0.215253	0.456761	0.44034
220.8		0.558717	0.670516	1.20945	0.655238	1.19618	1.28035	0.308544		1.10595	0.415533	0.258498	0.487596	0.522364
221.6		0.570625	0.631025	1.03167	0.608225	1.19122	1.41148	0.394765		0.986333	0.392096	0.219977	0.502296	0.477677
222.4		0.589812	0.725402	1.07816	0.652927	1.2894	1.39479	0.23638		0.856034	0.348159	0.249853	0.498595	0.431485
223.2		0.634016	0.707784	1.09047	0.628608	1.19188	1.42784	0.284699		0.996865	0.39299	0.300585	0.408446	0.40149
224		0.692732	0.706218	0.945285	0.603243	1.30293	1.24082	0.244705		1.03191	0.370052	0.33644	0.416766	0.400128
224.8		0.529988	0.90586	1.08118	0.608758	1.21567	1.29531	0.216176		1.12894	0.358944	0.357908	0.45988	0.374209
225.6		0.543654	0.694454	1.0287	0.647542	1.27112	1.4263	0.356308		0.973892	0.436636	0.305392	0.589222	0.354796
226.4		0.698395	0.66952	1.0894	0.526233	1.22732	1.53525	0.481806		1.07119	0.368272	0.33472	0.548056	0.362014
227.2		0.645005	0.612774	1.08587	0.691079	1.25733	1.23505	0.513422		1.183	0.325972	0.27691	0.63331	0.36385
228		0.708145	0.69223	1.0551	0.545999	1.03298	1.41689	0.438019		0.996492	0.337347	0.277216	0.531374	0.389471
228.8		0.640076	0.677962	1.00317	0.541101	1.06345	1.39333	0.494293		0.97575	0.348715	0.250173	0.585025	0.364918
229.6		0.725304	0.627434	1.05665	0.585349	1.01658	1.40693	0.435347		1.16862	0.4426	0.282197	0.548182	0.416777
230.4		0.621547	0.705674	1.13903	0.672475	1.08248	1.39382	0.451203		1.28179	0.51923	0.202595	0.507221	0.438076
231.2		0.762444	0.779544	1.03173	0.776928	1.17048	1.35785	0.415555		0.864593	0.476119	0.272965	0.49934	0.438163
232		0.824141	0.81716	1.09679	0.578602	1.15719	1.28486	0.460032		0.731207	0.402212	0.338961	0.44562	0.465861
232.8		0.947998	0.674074	1.04775	0.620518	1.15628	1.33371	0.294669		0.685059	0.388451	0.264449	0.482874	0.403429
233.6		0.924266	0.759111	1.15242	0.765788	1.09518	1.43139	0.2242		0.685925	0.449263	0.262652	0.314986	0.479584
234.4		0.812547	0.619908	1.06578	0.622126	1.0948	1.10882	0.256185		0.572929	0.431625	0.236549	0.401908	0.410417
235.2		0.77805	0.789017	1.13352	0.555884	1.12597	1.36865	0.228118		0.659297	0.414958	0.255528	0.325599	0.420825
236		0.710413	0.658592	0.994493	0.926282	1.17408	1.36129	0.255699		0.535327	0.443186	0.300501	0.319361	0.383335
236.8		0.790845	0.65956	1.0983	0.792707	1.12925	1.53529	0.368822		0.647225	0.497954	0.339725	0.304007	0.391632
237.6		0.803104	0.73362	1.02617	0.675096	1.03045	1.51768	0.357836		0.609569	0.512499	0.314094	0.350794	0.351044
238.4		0.758897	0.759951	1.05502	0.592408	1.28555	1.50979	0.456074		0.702774	0.484355	0.244998	0.318052	0.341941
239.2		1.05713	0.762028	1.06005	0.817861	1.04644	1.50981	0.853963		0.913195	0.479158	0.233812	0.334969	0.362376

## Sheet: Figure 6K
Area under the curve
WT	dhc-1
205.9	122.7
183.9	198.8
209.5	124.5
187.9	116.5
254.6	125.9
288.3	120.6
Unpaired t test with Welch's correction
P value	0.0025
P value summary	**
Significantly different (P < 0.05)?	Yes
One- or two-tailed P value?	Two-tailed
Welch-corrected t, df	t=4.101, df=9.358

## Sheet: Figure 6O
percentage of Minus-end-out EBP-2 tracks in proximal dendrite
WT	dhc-1
94.74	82.7586
100	0
100	47.0588
84.85	0
100	86.3636
70	0
100	17.6471
94.12	84.2105
90	76.4706
92.59	0
90	50
	50
	0
	0
	16.6667
Unpaired t test with Welch's correction
P value	<0.0001
P value summary	****
Significantly different (P < 0.05)?	Yes
One- or two-tailed P value?	Two-tailed
Welch-corrected t, df	t=6.102, df=16.39
