# Supplementary material for: Growth cone-localized microtubule organizing center establishes microtubule orientation in dendrites
Source: eLife. 2020 Jul 13;9:e56547. doi: 10.7554/eLife.56547 (PMC7375809; doi:10.7554/eLife.56547)
Supplement: Supplementary file 1. [file elife-56547-supp1.xlsx]

## Sheet: Plasmids
Plasmid ID	Contains	Insertion	Amplified from	Ligation/Gibson	Primer 1	Primer 2	Primer 3	Primer 4	5' site	3' site	Inserted into	With this removed:	Using enzyme 1:	Using enzyme 2:	Additional information
pMK41	Punc-86::mCherry::PLCdeltaPH::unc-54 3'UTR	mCherry	pJL184(Plin-53::mCherry)	Gibson	GF_punc86AscIXmaImCherry	GR_mCherrylinkerNheIPLCd			AscIXmaI	NheI	pJY307(punc-86::mRuby3::PLCdeltaPH::unc-54 3'UTR)	mRuby3+linker	XmaI	NheI	Red membrane marker expressed in early PVD(and many other neurons). Injected to generate wyEx9745
pMK32	Punc-86::zif-1::let-858 3'UTR	zif-1	pJL164(Pegl-26::zif-1 genomic::SL2::tbb-2 3'UTR)		GF_punc86AscIzif1	GR_zif-1NheIlet858			AscI	NheI	pMK6(punc-86::rho-1::let-858 3'UTR)	rho-1	AscI	NheI	PVD specific expression of ZIF-1, Injected to generate wyEx9744
pLX85	Punc-86::AMAN-2(1-84aa)::GFP novo2::let-858 3'UTR	Punc-86	pMK2(Punc-86::sax-3a::gfp)	regular ligation							Pitr-1::AMAN-2(1-84aa)::gfp novo2		SphI	Asc I	Green cis golgi marker. Injected to generate wyEx9876
pLX86	Punc-86::gfp::rab-6.2 cDNA::unc-54 3'UTR	Punc-86	pMK2(Punc-86::sax-3a::gfp)	regular ligation							pCM501		SphI	Asc I	Green trans golgi marker. Injected to generate wyEx10015
pLX90	Punc-86::mCherry::rab-6.2 cDNA::unc-54 3'UTR	rab-6.2 cDNA::unc-54 3'UTR	pCM501 (Pdat-1L::gfp::rab-6.2(cDNA)::unc-54 3'UTR)	regular ligation							pMK41		Nhe I	Apa I	Red trans golgi marker. Injected to generate wyEx10092
pLX96	Punc-86::unc-116::unc-54 3'UTR	unc-116(cDNA)	worm cDNA	Infusion	119	120					pMK41				unc-116 rescue in early PVD. Injected to generate wyEx10049
pLX98	ser-2P3::unc-116::unc-54 3'UTR	unc-116(cDNA)::unc-54 3'UTR	pLX96	regular ligation							pTL107 (ser-2P3::nlp-12::venus)		Asc I	Apa I	unc-116 rescue in late PVD. Injected to generate wyEx10117; wyEx10104; wyEx10090
pLX99	Punc-86::gfp::rab-11.1 cDNA::unc-54 3'UTR	Punc-86	pMK2(Punc-86::sax-3a::gfp)	regular ligation							Pmig-13::gfp::rab-11.1		SphI	Asc I	Green recycling endosome marker. Injected to generate wyEx10092
pLX104	Punc-86::mCherry::rer-1cDNA::unc-54 3'UTR	rer-1 cDNA	worm cDNA	Infusion	152	153					pLX90		Nhe I	Kpn I-HF	Red cis golgi marker. Injected to generate wyEx10015
pLX107	Punc-86::mCherry::rab-11.1 cDNA::unc-54 3'UTR	rab-11.1 cDNA	pLX99	regular ligation	168	169			Nhe I	Kpn I-HF	pLX90		Nhe I	Kpn I-HF	Red recycling endosome marker. Injected to generate wyEx10042; wyEx10099 and wyEx10110
pLX110	Punc-86::mCherry::RAB-11(S25N)::unc-54 3'UTR	mCherry::RAB-11(S25N)	pLX107	Infusion	174	175	176	177			pMK41				Dominant-Negative RAB-11.1. Injected to generate wyEx10042
pCY26	Punc-86::Cre	Punc-86	pPH36	regular ligation							pCM560		Sph I	Xma I	PVD specific expression of Cre, Injected to generate wyEx10192
pCM327	Pmig-13::mCherry::unc-10 3'UTR	Pmig-13											Sph I	Asc I	DA9 morphology marker, Injected to generate wyEx10112

## Sheet: Oligos
Oligos	sequence
GF_punc86AscIXmaImCherry	GGCGCGCCTCTAGAGGATCCCCGGGATGGTCTCAAAGGGTGAAGAAGAT
GR_mCherrylinkerNheIPLCd	ACGCTCTTGGCCATGCTAGCTCCTCCGGATCCTCCCTTATACAATTCATCCATGCCACC
GF_punc86AscIzif1	CCCTCTTTTCCACGGACGGCGCGCCATGAGTGAGTGTTCCGCGAGTA
GR_zif-1NheIlet858	ATACCATGGTACCGTCGACGCTAGCATTGTTGAATATTTATCGTGCACAAATTTTC
119	TCCACGGACGGCGCGCCATGGAGCCGCGGACAGA
120	GATATCAATACCATGGTACCTTATGCGTTTGAGCCATTTGGAGCTCC
168	GGAGCTAGCATGGGCTCTCGTGACGATGAATAC
169	CATGGTACCTTATGGGATGCAACACTGCTTC
174	TCCACGGACGGCGCGCCTCTAGAGGATCCCCCGGG
175	GACAGGAGATTGTTCTTTCCGACGCCTGAG
176	GAACAATCTCCTGTCTCGTTTCACAAG
177	GATATCAATACCATGGTACCTTATGGGATGC
